# Supplementary material for: Standardized patient profile review using large language models for case adjudication in observational research
Source: Springer Nature journal article supplement (doi:10.1038/s41746-025-01433-4), 2025-01-09
Supplement: 41746_2025_1433_MOESM1_ESM.pdf [file 41746_2025_1433_MOESM1_ESM.pdf]

## Supplementary Materials

For “Standardized patient profile review using large language models for case adjudication in observational research”

### Table of Contents

|                                                             |   |
|-------------------------------------------------------------|---|
| Supplementary Table 1: KEEPER time windows.....             | 2 |
| Supplementary Table 2: Groupings of KEEPER categories ..... | 3 |
| Supplementary Table 3 : Outcome case definitions .....      | 3 |
| Supplementary Note 1: Outcome Phenotype Algorithms .....    | 4 |
| Rheumatoid Arthritis (Cohort 858) .....                     | 4 |
| Cohort Entry Events.....                                    | 4 |
| Cohort Exit.....                                            | 4 |
| Cohort Eras.....                                            | 4 |
| Rheumatoid arthritis .....                                  | 4 |
| Hyperlipidemia (Cohort 1219) .....                          | 5 |
| Cohort Entry Events.....                                    | 5 |
| Cohort Exit.....                                            | 5 |
| Cohort Eras.....                                            | 5 |
| Hyperlipidemia .....                                        | 5 |
| Hypoparathyroidism (Cohort 1220).....                       | 5 |
| Cohort Entry Events.....                                    | 5 |
| Cohort Exit.....                                            | 5 |
| Cohort Eras.....                                            | 6 |
| Hypoparathyroidism .....                                    | 6 |
| Osteoporosis (Cohort 1221).....                             | 6 |
| Cohort Entry Events.....                                    | 6 |
| Cohort Exit.....                                            | 6 |
| Cohort Eras.....                                            | 6 |
| Osteoporosis .....                                          | 6 |
| Viral Hepatitis A (Cohort 1222).....                        | 6 |
| Cohort Entry Events.....                                    | 6 |
| Cohort Exit.....                                            | 6 |
| Cohort Eras.....                                            | 6 |

|                                                       |    |
|-------------------------------------------------------|----|
| Type A viral hepatitis .....                          | 7  |
| Supplementary Note 2: KEEPER input concept sets ..... | 7  |
| Acute bronchitis .....                                | 7  |
| Hyperlipidemia .....                                  | 8  |
| Hypoparathyroidism .....                              | 11 |
| Osteoporosis .....                                    | 17 |
| Rheumatoid arthritis .....                            | 20 |
| Viral hepatitis type A .....                          | 24 |
| Diabetes mellitus type I .....                        | 31 |
| Acute appendicitis .....                              | 34 |
| End-stage renal disease .....                         | 45 |
| Chronic obstructive pulmonary disorder (COPD) .....   | 47 |
| Supplementary Note 3: LLM response parser .....       | 48 |
| Supplementary Note 4: System prompt templates .....   | 49 |
| Yes/no .....                                          | 49 |
| + discuss evidence .....                              | 50 |
| + write narrative .....                               | 50 |
| + diagnosis insufficient reminder .....               | 50 |
| + uncertainty instructions .....                      | 51 |
| + provide examples .....                              | 51 |
| Supplementary Note 5: Example prompt .....            | 54 |
| Supplementary Note 6: Example LLM output .....        | 54 |
| Supplementary Note 7: Performance on test set 1 ..... | 56 |
| Supplementary Note 8: Performance on test set 2 ..... | 58 |
| Supplementary Note 9: Performance on test set 3 ..... | 60 |

### Supplementary Table 1: KEEPER time windows

| Category                       | Days relative to index date |
|--------------------------------|-----------------------------|
| Demographics                   | 0                           |
| Presentation                   | 0                           |
| Disease history                | -9999 to -1                 |
| Disease progression            | 1 to 9999                   |
| Symptoms                       | -30 to -1                   |
| Comorbidities and risk factors | -9999 to -1                 |

| Category                    | Days relative to index date |
|-----------------------------|-----------------------------|
| Differential diagnoses      | -90 to 90                   |
| Diagnostic procedures       | -30 to 30                   |
| Measurements                | -9999 to -1                 |
| Drug treatment history      | -9999 to -1                 |
| Drug treatment              | 0 to 9999                   |
| Procedure treatment history | -9999 to -1                 |
| Procedure treatment         | 0 to 9999                   |
| Death                       | 0 to 9999                   |
| Visit context               | 0                           |

## Supplementary Table 2: Groupings of KEEPER categories

To generate the prompt, KEEPER categories were combined into single sections and provided with a descriptive header.

| Section header                                        | KEEPER sections                                        |
|-------------------------------------------------------|--------------------------------------------------------|
| Demographics and details about the visit:             | demographics, visit context                            |
| Diagnoses recorded on the day of the visit:           | presentation                                           |
| Diagnoses recorded prior to the visit:                | disease history, symptoms, comorbidities, risk factors |
| Treatments recorded prior to the visit:               | drug treatment history, procedure treatment history    |
| Diagnostic procedures recorded proximal to the visit: | diagnostic procedures                                  |
| Laboratory tests recorded proximal to the visit:      | measurements                                           |
| Alternative diagnoses recorded proximal to the visit: | differential diagnoses                                 |
| Diagnoses recorded after the visit:                   | disease progression                                    |
| Treatments recorded during or after the visit:        | drug treatment, procedure treatment                    |

## Supplementary Table 3 : Outcome case definitions

The outcome case definitions used in this study are those provided by the National Library of Medicine. The table below lists the hyperlinks to the relevant pages for each disease.

| Disease                | Clinical description link                                                                                 |
|------------------------|-----------------------------------------------------------------------------------------------------------|
| Acute bronchitis.      | <a href="https://www.ncbi.nlm.nih.gov/books/NBK448067/">https://www.ncbi.nlm.nih.gov/books/NBK448067/</a> |
| Hyperlipidemia.        | <a href="https://www.ncbi.nlm.nih.gov/books/NBK559182/">https://www.ncbi.nlm.nih.gov/books/NBK559182/</a> |
| Hypoparathyroidism.    | <a href="https://www.ncbi.nlm.nih.gov/books/NBK441899/">https://www.ncbi.nlm.nih.gov/books/NBK441899/</a> |
| Osteoporosis.          | <a href="https://www.ncbi.nlm.nih.gov/books/NBK441901/">https://www.ncbi.nlm.nih.gov/books/NBK441901/</a> |
| Rheumatoid arthritis.  | <a href="https://www.ncbi.nlm.nih.gov/books/NBK441999/">https://www.ncbi.nlm.nih.gov/books/NBK441999/</a> |
| Viral hepatitis type A | <a href="https://www.ncbi.nlm.nih.gov/books/NBK459290/">https://www.ncbi.nlm.nih.gov/books/NBK459290/</a> |

## Supplementary Note 1: Outcome Phenotype Algorithms

The phenotype algorithms used in this study are part of the OHDSI Phenotype Library (<https://ohdsi.github.io/PhenotypeLibrary/>), where computer-executable SQL code can be found to execute the algorithms on a database in the OMOP Common Data Model. The Cohort ID mentioned in each section header corresponds to the ID in the Phenotype Library.

### Rheumatoid Arthritis (Cohort 858)

#### Cohort Entry Events

People enter the cohort when observing any of the following:

1. condition occurrence of 'Rheumatoid arthritis' for the first time in the person's history.
2. observation of 'Rheumatoid arthritis' for the first time in the person's history.

Limit cohort entry events to the earliest event per person.

#### Cohort Exit

The person also exists the cohort at the end of continuous observation.

#### Cohort Eras

Remaining events will be combined into cohort eras if they are within 0 days of each other.

#### Rheumatoid arthritis

| Concept ID | Concept Name                                                                                                      | Code           | Vocabulary | Excluded | Descendants | Mapped |
|------------|-------------------------------------------------------------------------------------------------------------------|----------------|------------|----------|-------------|--------|
| 4297650    | Cutaneous atrophy due to rheumatoid arthritis                                                                     | 402431009      | SNOMED     | NO       | YES         | NO     |
| 4334806    | Deformity of foot due to rheumatoid arthritis                                                                     | 433228003      | SNOMED     | NO       | YES         | NO     |
| 46273442   | Deformity of hand due to rheumatoid arthritis                                                                     | 96531000119109 | SNOMED     | NO       | YES         | NO     |
| 2107572    | Disease prognosis for rheumatoid arthritis assessed, good prognosis documented (RA)                               | 3476F          | CPT4       | NO       | YES         | NO     |
| 2107561    | Disease prognosis for rheumatoid arthritis assessed, poor prognosis documented (RA)                               | 3475F          | CPT4       | NO       | YES         | NO     |
| 4107913    | Myopathy due to rheumatoid arthritis                                                                              | 193250002      | SNOMED     | NO       | YES         | NO     |
| 2108721    | Patient receiving first-time biologic disease modifying anti-rheumatic drug therapy for rheumatoid arthritis (RA) | 4195F          | CPT4       | NO       | YES         | NO     |
| 4102493    | Polyneuropathy in rheumatoid arthritis                                                                            | 193180002      | SNOMED     | NO       | YES         | NO     |
| 80809      | Rheumatoid arthritis                                                                                              | 69896004       | SNOMED     | NO       | YES         | NO     |
| 2107560    | Rheumatoid arthritis (RA) disease                                                                                 | 3472F          | CPT4       | NO       | YES         | NO     |

| Concept ID | Concept Name                                              | Code      | Vocabulary | Excluded | Descendants | Mapped |
|------------|-----------------------------------------------------------|-----------|------------|----------|-------------|--------|
|            | activity, high (RA)                                       |           |            |          |             |        |
| 2107558    | Rheumatoid arthritis (RA) disease activity, low (RA)      | 3470F     | CPT4       | NO       | YES         | NO     |
| 2107559    | Rheumatoid arthritis (RA) disease activity, moderate (RA) | 3471F     | CPT4       | NO       | YES         | NO     |
| 4083556    | Seronegative rheumatoid arthritis                         | 239792003 | SNOMED     | NO       | YES         | NO     |
| 4035611    | Seropositive rheumatoid arthritis                         | 239791005 | SNOMED     | NO       | YES         | NO     |

### Hyperlipidemia (Cohort 1219)

#### Cohort Entry Events

People enter the cohort when observing any of the following:

1. condition occurrences of 'Hyperlipidemia'.

Limit cohort entry events to the earliest event per person.

#### Cohort Exit

The person also exists the cohort at the end of continuous observation.

#### Cohort Eras

Remaining events will be combined into cohort eras if they are within 0 days of each other.

#### Hyperlipidemia

Concept

| Concept ID | Concept Name                 | Code      | Vocabulary | Excluded | Descendants | Mapped |
|------------|------------------------------|-----------|------------|----------|-------------|--------|
| 432867     | Hyperlipidemia               | 55822004  | SNOMED     | NO       | YES         | NO     |
| 437530     | Disorder of lipid metabolism | 267431006 | SNOMED     | NO       | NO          | NO     |

### Hypoparathyroidism (Cohort 1220)

#### Cohort Entry Events

People enter the cohort when observing any of the following:

1. condition occurrences of 'Hypoparathyroidism'.

Limit cohort entry events to the earliest event per person.

#### Cohort Exit

The person also exists the cohort at the end of continuous observation.

### Cohort Eras

Remaining events will be combined into cohort eras if they are within 0 days of each other.

### Hypoparathyroidism

Concept

| ID         | Concept Name       | Code     | Vocabulary | Excluded | Descendants | Mapped |
|------------|--------------------|----------|------------|----------|-------------|--------|
| 140<br>362 | Hypoparathyroidism | 36976004 | SNOMED     | NO       | YES         | NO     |

---

### Osteoporosis (Cohort 1221)

#### Cohort Entry Events

People enter the cohort when observing any of the following:

1. condition occurrences of 'Osteoporosis'.

Limit cohort entry events to the earliest event per person.

#### Cohort Exit

The person also exists the cohort at the end of continuous observation.

#### Cohort Eras

Remaining events will be combined into cohort eras if they are within 0 days of each other.

### Osteoporosis

Concept

| ID        | Concept Name | Code     | Vocabulary | Excluded | Descendants | Mapped |
|-----------|--------------|----------|------------|----------|-------------|--------|
| 805<br>02 | Osteoporosis | 64859006 | SNOMED     | NO       | YES         | NO     |

---

### Viral Hepatitis A (Cohort 1222)

#### Cohort Entry Events

People enter the cohort when observing any of the following:

1. condition occurrences of 'Type A viral hepatitis'.

Limit cohort entry events to the earliest event per person.

#### Cohort Exit

The person also exists the cohort at the end of continuous observation.

#### Cohort Eras

Remaining events will be combined into cohort eras if they are within 0 days of each other.

### Type A viral hepatitis

| Concept ID | Concept Name                          | Code      | Vocabulary | Excluded | Descendants | Mapped |
|------------|---------------------------------------|-----------|------------|----------|-------------|--------|
| 4223947    | Viral hepatitis, type A               | 40468003  | SNOMED     | NO       | YES         | NO     |
| 4013974    | Hepatitis A test positive             | 165997004 | SNOMED     | NO       | YES         | NO     |
| 194856     | Hepatic coma due to viral hepatitis A | 16060001  | SNOMED     | NO       | YES         | NO     |

## Supplementary Note 2: KEEPER input concept sets

The KEEPER algorithm automatically expands the concept sets below to include all descendant concepts.

### Acute bronchitis

| KEEPER category       | Concept ID | Concept Name                        |
|-----------------------|------------|-------------------------------------|
| Disease of Interest   | 255841     | Chronic bronchitis                  |
| Disease of Interest   | 256451     | Bronchitis                          |
| Disease of Interest   | 260139     | Acute bronchitis                    |
| Measurements          | 4020553    | Oxygen saturation measurement       |
| Measurements          | 4220748    | Immunoglobulin E measurement        |
| Complications         | 255848     | Pneumonia                           |
| Complications         | 4195694    | Acute respiratory distress syndrome |
| Complications         | 4256228    | Respiratory failure                 |
| Alternative Diagnosis | 255573     | Chronic obstructive lung disease    |
| Alternative Diagnosis | 257011     | Acute upper respiratory infection   |
| Alternative Diagnosis | 260123     | Acute sinusitis                     |
| Alternative Diagnosis | 316139     | Heart failure                       |
| Alternative Diagnosis | 317009     | Asthma                              |
| Alternative Diagnosis | 318800     | Gastroesophageal reflux disease     |
| Alternative Diagnosis | 440417     | Pulmonary embolism                  |
| Alternative           | 4035987    | Viral pharyngitis                   |

| KEEPER category       | Concept ID | Concept Name                                                                                                                                                                                                                                                    |
|-----------------------|------------|-----------------------------------------------------------------------------------------------------------------------------------------------------------------------------------------------------------------------------------------------------------------|
| Diagnosis             |            |                                                                                                                                                                                                                                                                 |
| Alternative Diagnosis | 4165112    | Bronchiolitis                                                                                                                                                                                                                                                   |
| Symptoms              | 254761     | Cough                                                                                                                                                                                                                                                           |
| Symptoms              | 256451     | Bronchitis                                                                                                                                                                                                                                                      |
| Symptoms              | 260123     | Acute sinusitis                                                                                                                                                                                                                                                 |
| Symptoms              | 4047791    | Abnormal body temperature                                                                                                                                                                                                                                       |
| Symptoms              | 4089228    | Sputum finding                                                                                                                                                                                                                                                  |
| Symptoms              | 46273539   | Acute bronchospasm                                                                                                                                                                                                                                              |
| Comorbidities         | 437264     | Tobacco dependence syndrome                                                                                                                                                                                                                                     |
| Comorbidities         | 443410     | Infective pneumonia                                                                                                                                                                                                                                             |
| Drugs                 | 1101703    | homatropine                                                                                                                                                                                                                                                     |
| Drugs                 | 1136601    | benzonatate                                                                                                                                                                                                                                                     |
| Drugs                 | 1153428    | fexofenadine                                                                                                                                                                                                                                                    |
| Drugs                 | 1154343    | albuterol                                                                                                                                                                                                                                                       |
| Drugs                 | 1163944    | guaifenesin                                                                                                                                                                                                                                                     |
| Drugs                 | 1192218    | levalbuterol                                                                                                                                                                                                                                                    |
| Drugs                 | 1192710    | chlorpheniramine                                                                                                                                                                                                                                                |
| Drugs                 | 1713332    | amoxicillin                                                                                                                                                                                                                                                     |
| Drugs                 | 1734104    | azithromycin                                                                                                                                                                                                                                                    |
| Drugs                 | 1750500    | clarithromycin                                                                                                                                                                                                                                                  |
| Diagnostic Procedures | 2008419    | Other miscellaneous procedures                                                                                                                                                                                                                                  |
| Diagnostic Procedures | 2211361    | Radiologic examination, chest, 2 views, frontal and lateral                                                                                                                                                                                                     |
| Diagnostic Procedures | 2314026    | Pressurized or nonpressurized inhalation treatment for acute airway obstruction for therapeutic purposes and/or for diagnostic purposes such as sputum induction with an aerosol generator, nebulizer, metered dose inhaler or intermittent positive pressure b |
| Diagnostic Procedures | 2314037    | Demonstration and/or evaluation of patient utilization of an aerosol generator, nebulizer, metered dose inhaler or IPPB device                                                                                                                                  |
| Diagnostic Procedures | 42738270   | Blood count; hemogram and platelet count, automated, and automated partial differential WBC count (CBC) (Deprecated)                                                                                                                                            |
| Diagnostic Procedures | 42740865   | Therapeutic, prophylactic or diagnostic injection (specify substance or drug); subcutaneous or intramuscular                                                                                                                                                    |

### Hyperlipidemia

| KEEPER category     | Concept ID | Concept Name                 |
|---------------------|------------|------------------------------|
| Disease of Interest | 432867     | Hyperlipidemia               |
| Disease of Interest | 437530     | Disorder of lipid metabolism |
| Alternative         | 437530     | Disorder of lipid metabolism |



| KEEPER category | Concept ID | Concept Name                                                              |
|-----------------|------------|---------------------------------------------------------------------------|
| Diagnosis       |            |                                                                           |
| Comorbidities   | 77646      | Disorder of bone and articular cartilage                                  |
| Comorbidities   | 81611      | Diverticular disease of colon                                             |
| Comorbidities   | 201072     | Benign prostatic hyperplasia without outflow obstruction                  |
| Comorbidities   | 201820     | Diabetes mellitus                                                         |
| Comorbidities   | 312648     | Benign essential hypertension                                             |
| Comorbidities   | 317576     | Coronary arteriosclerosis                                                 |
| Comorbidities   | 318800     | Gastroesophageal reflux disease                                           |
| Comorbidities   | 319843     | Mitral valve disorder                                                     |
| Comorbidities   | 432867     | Hyperlipidemia                                                            |
| Comorbidities   | 437264     | Tobacco dependence syndrome                                               |
| Comorbidities   | 437530     | Disorder of lipid metabolism                                              |
| Comorbidities   | 438557     | Abnormal glucose level                                                    |
| Comorbidities   | 443238     | Diabetic - poor control                                                   |
| Comorbidities   | 4172857    | Menopause finding                                                         |
| Complications   | 134057     | Disorder of cardiovascular system                                         |
| Drugs           | 1510813    | rosuvastatin                                                              |
| Drugs           | 1539403    | simvastatin                                                               |
| Drugs           | 1545958    | atorvastatin                                                              |
| Drugs           | 1549686    | fluvastatin                                                               |
| Drugs           | 1551860    | pravastatin                                                               |
| Drugs           | 1592085    | lovastatin                                                                |
| Drugs           | 1592180    | cerivastatin                                                              |
| Drugs           | 1797258    | cilastatin                                                                |
| Drugs           | 40165636   | pitavastatin                                                              |
| Measurements    | 3000905    | Leukocytes [# /volume] in Blood by Automated count                        |
| Measurements    | 3000963    | Hemoglobin [Mass/volume] in Blood                                         |
| Measurements    | 3004501    | Glucose [Mass/volume] in Serum or Plasma                                  |
| Measurements    | 3006906    | Calcium [Mass/volume] in Serum or Plasma                                  |
| Measurements    | 3006923    | Alanine aminotransferase [Enzymatic activity/volume] in Serum or Plasma   |
| Measurements    | 3007070    | Cholesterol in HDL [Mass/volume] in Serum or Plasma                       |
| Measurements    | 3009220    | Epithelial cells.squamous [# /volume] in Urine sediment                   |
| Measurements    | 3009596    | Cholesterol in VLDL [Mass/volume] in Serum or Plasma by calculation       |
| Measurements    | 3009744    | MCHC [Mass/volume] by Automated count                                     |
| Measurements    | 3012030    | MCH [Entitic mass] by Automated count                                     |
| Measurements    | 3013473    | Cholesterol in HDL [Mass/volume] in Serum or Plasma ultracentrifugate     |
| Measurements    | 3013682    | Urea nitrogen [Mass/volume] in Serum or Plasma                            |
| Measurements    | 3013721    | Aspartate aminotransferase [Enzymatic activity/volume] in Serum or Plasma |
| Measurements    | 3014576    | Chloride [Moles/volume] in Serum or Plasma                                |

| KEEPER category       | Concept ID | Concept Name                                                                                                                      |
|-----------------------|------------|-----------------------------------------------------------------------------------------------------------------------------------|
| Measurements          | 3015632    | Carbon dioxide, total [Moles/volume] in Serum or Plasma                                                                           |
| Measurements          | 3016723    | Creatinine [Mass/volume] in Serum or Plasma                                                                                       |
| Measurements          | 3018311    | Urea nitrogen/Creatinine [Mass Ratio] in Serum or Plasma                                                                          |
| Measurements          | 3019550    | Sodium [Moles/volume] in Serum or Plasma                                                                                          |
| Measurements          | 3019897    | Erythrocyte distribution width [Ratio] by Automated count                                                                         |
| Measurements          | 3020416    | Erythrocytes [# /volume] in Blood by Automated count                                                                              |
| Measurements          | 3020509    | Albumin/Globulin [Mass Ratio] in Serum or Plasma                                                                                  |
| Measurements          | 3020630    | Protein [Mass/volume] in Serum or Plasma                                                                                          |
| Measurements          | 3022113    | Urinalysis microscopic panel - Urine sediment                                                                                     |
| Measurements          | 3022192    | Triglyceride [Mass/volume] in Serum or Plasma                                                                                     |
| Measurements          | 3023103    | Potassium [Moles/volume] in Serum or Plasma                                                                                       |
| Measurements          | 3023314    | Hematocrit [Volume Fraction] of Blood by Automated count                                                                          |
| Measurements          | 3023599    | MCV [Entitic volume] by Automated count                                                                                           |
| Measurements          | 3024128    | Bilirubin.total [Mass/volume] in Serum or Plasma                                                                                  |
| Measurements          | 3024561    | Albumin [Mass/volume] in Serum or Plasma                                                                                          |
| Measurements          | 3024929    | Platelets [# /volume] in Blood by Automated count                                                                                 |
| Measurements          | 3027114    | Cholesterol [Mass/volume] in Serum or Plasma                                                                                      |
| Measurements          | 3027970    | Globulin [Mass/volume] in Serum by calculation                                                                                    |
| Measurements          | 3028089    | Alkaline phosphatase isoenzyme [Units/volume] in Serum or Plasma                                                                  |
| Measurements          | 3028288    | Cholesterol in LDL [Mass/volume] in Serum or Plasma by calculation                                                                |
| Measurements          | 3035995    | Alkaline phosphatase [Enzymatic activity/volume] in Serum or Plasma                                                               |
| Measurements          | 3040168    | Immature granulocytes [# /volume] in Blood                                                                                        |
| Measurements          | 4018619    | Screening for occult blood in feces                                                                                               |
| Measurements          | 4034850    | Laboratory test                                                                                                                   |
| Measurements          | 4062484    | Screening for malignant neoplasm of cervix                                                                                        |
| Measurements          | 4077697    | Screening mammography                                                                                                             |
| Measurements          | 4152047    | Hyperlipidemia screening                                                                                                          |
| Measurements          | 4175226    | Screening for malignant neoplasm of colon                                                                                         |
| Measurements          | 4246879    | Thyroid stimulating hormone measurement                                                                                           |
| Measurements          | 40481096   | Screening for malignant neoplasm of prostate                                                                                      |
| Measurements          | 44793131   | Total prostate specific antigen level                                                                                             |
| Diagnostic Procedures | 9201       | Inpatient Visit                                                                                                                   |
| Diagnostic Procedures | 2001500    | Single vessel percutaneous transluminal coronary angioplasty [PTCA] or coronary atherectomy without mention of thrombolytic agent |
| Diagnostic Procedures | 2008419    | Other miscellaneous procedures                                                                                                    |
| Diagnostic Procedures | 2108115    | Collection of venous blood by venipuncture                                                                                        |
| Diagnostic Procedures | 2211359    | Radiologic examination, chest; single view, frontal                                                                               |

| KEEPER category       | Concept ID | Concept Name                                                                                                                                                                                                                                          |
|-----------------------|------------|-------------------------------------------------------------------------------------------------------------------------------------------------------------------------------------------------------------------------------------------------------|
| Diagnostic Procedures | 2211361    | Radiologic examination, chest, 2 views, frontal and lateral                                                                                                                                                                                           |
| Diagnostic Procedures | 2313814    | Electrocardiogram, routine ECG with at least 12 leads; with interpretation and report                                                                                                                                                                 |
| Diagnostic Procedures | 2313870    | Echocardiography, transthoracic, real-time with image documentation (2D), includes M-mode recording, when performed, complete, without spectral or color Doppler echocardiography                                                                     |
| Diagnostic Procedures | 4036803    | General examination of patient                                                                                                                                                                                                                        |
| Diagnostic Procedures | 4141759    | Long-term drug therapy                                                                                                                                                                                                                                |
| Diagnostic Procedures | 4283892    | Placement of stent in coronary artery                                                                                                                                                                                                                 |
| Diagnostic Procedures | 4306780    | Gynecologic examination                                                                                                                                                                                                                               |
| Diagnostic Procedures | 42734963   | Myocardial perfusion study with wall motion, qualitative or quantitative study (List separately in addition to code for primary procedure)                                                                                                            |
| Diagnostic Procedures | 42734964   | Myocardial perfusion study with ejection fraction (List separately in addition to code for primary procedure)                                                                                                                                         |
| Diagnostic Procedures | 42737560   | Screening mammography, bilateral (two view film study of each breast) (Deprecated)                                                                                                                                                                    |
| Diagnostic Procedures | 42738270   | Blood count; hemogram and platelet count, automated, and automated partial differential WBC count (CBC) (Deprecated)                                                                                                                                  |
| Diagnostic Procedures | 42738308   | Unlisted miscellaneous pathology test (Deprecated)                                                                                                                                                                                                    |
| Diagnostic Procedures | 42739106   | Myocardial perfusion imaging; tomographic (SPECT), multiple studies (including attenuation correction when performed), at rest and/or stress (exercise and/or pharmacologic) and redistribution and/or rest injection, with or without quantification |
| Diagnostic Procedures | 42739299   | Lipoprotein, blood; high resolution fractionation and quantitation of lipoprotein cholesterols (eg, electrophoresis, nuclear magnetic resonance, ultracentrifugation) (Deprecated)                                                                    |
| Diagnostic Procedures | 44782057   | DRAWING BLOOD FOR SPECIMEN (Deprecated)                                                                                                                                                                                                               |

### Hypoparathyroidism

| KEEPER category       | Concept ID | Concept Name                                      |
|-----------------------|------------|---------------------------------------------------|
| Disease of Interest   | 140362     | Hypoparathyroidism                                |
| Alternative Diagnosis | 77646      | Disorder of bone and articular cartilage          |
| Alternative Diagnosis | 140357     | Neoplasm of uncertain behavior of endocrine gland |
| Alternative Diagnosis | 255919     | Finding of head and neck region                   |

| KEEPER category       | Concept ID | Concept Name                                 |
|-----------------------|------------|----------------------------------------------|
| Alternative Diagnosis | 315085     | Lymphadenopathy                              |
| Alternative Diagnosis | 380534     | Tetany                                       |
| Alternative Diagnosis | 434300     | Neuroendocrine tumor                         |
| Alternative Diagnosis | 435788     | Disorder of phosphorus metabolism            |
| Alternative Diagnosis | 437828     | Disorder of calcium metabolism               |
| Alternative Diagnosis | 438624     | Complication of renal dialysis               |
| Alternative Diagnosis | 441830     | Disorder of fluid AND/OR electrolyte         |
| Alternative Diagnosis | 444239     | Postprocedural state finding                 |
| Alternative Diagnosis | 4130839    | Neoplasm of lymph node                       |
| Alternative Diagnosis | 4172857    | Menopause finding                            |
| Alternative Diagnosis | 4176807    | Endocrine system complication of procedure   |
| Alternative Diagnosis | 35624485   | 22q11.2 deletion syndrome                    |
| Alternative Diagnosis | 42537310   | Neonatal metabolic disorder                  |
| Alternative Diagnosis | 45770748   | Endocrine function test abnormal             |
| Complications         | 435510     | Hypocalcemia                                 |
| Symptoms              | 30365      | Panhypopituitarism                           |
| Symptoms              | 77646      | Disorder of bone and articular cartilage     |
| Symptoms              | 133727     | Thyrotoxicosis without goiter or other cause |
| Symptoms              | 135215     | Hashimoto thyroiditis                        |
| Symptoms              | 138384     | Acquired hypothyroidism                      |
| Symptoms              | 138713     | Disorder of parathyroid gland                |
| Symptoms              | 140364     | Disorder of thyrocalcitonin secretion        |
| Symptoms              | 435788     | Disorder of phosphorus metabolism            |
| Symptoms              | 437828     | Disorder of calcium metabolism               |
| Symptoms              | 438624     | Complication of renal dialysis               |
| Symptoms              | 439926     | Malaise and fatigue                          |
| Symptoms              | 441830     | Disorder of fluid AND/OR electrolyte         |
| Symptoms              | 444239     | Postprocedural state finding                 |
| Symptoms              | 4090425    | Altered sensation of skin                    |

| KEEPER category | Concept ID | Concept Name                                                                                                                                                                                                                                               |
|-----------------|------------|------------------------------------------------------------------------------------------------------------------------------------------------------------------------------------------------------------------------------------------------------------|
| Symptoms        | 4150384    | Urine cytology abnormal                                                                                                                                                                                                                                    |
| Comorbidities   | 30365      | Panhypopituitarism                                                                                                                                                                                                                                         |
| Comorbidities   | 77646      | Disorder of bone and articular cartilage                                                                                                                                                                                                                   |
| Comorbidities   | 133424     | Primary malignant neoplasm of thyroid gland                                                                                                                                                                                                                |
| Comorbidities   | 133727     | Thyrotoxicosis without goiter or other cause                                                                                                                                                                                                               |
| Comorbidities   | 133728     | Congenital hypothyroidism                                                                                                                                                                                                                                  |
| Comorbidities   | 135215     | Hashimoto thyroiditis                                                                                                                                                                                                                                      |
| Comorbidities   | 135772     | Goiter                                                                                                                                                                                                                                                     |
| Comorbidities   | 138384     | Acquired hypothyroidism                                                                                                                                                                                                                                    |
| Comorbidities   | 140357     | Neoplasm of uncertain behavior of endocrine gland                                                                                                                                                                                                          |
| Comorbidities   | 319843     | Mitral valve disorder                                                                                                                                                                                                                                      |
| Comorbidities   | 380534     | Tetany                                                                                                                                                                                                                                                     |
| Comorbidities   | 438624     | Complication of renal dialysis                                                                                                                                                                                                                             |
| Comorbidities   | 444239     | Postprocedural state finding                                                                                                                                                                                                                               |
| Comorbidities   | 4113821    | Anxiety state                                                                                                                                                                                                                                              |
| Comorbidities   | 4130839    | Neoplasm of lymph node                                                                                                                                                                                                                                     |
| Comorbidities   | 4172857    | Menopause finding                                                                                                                                                                                                                                          |
| Comorbidities   | 35624485   | 22q11.2 deletion syndrome                                                                                                                                                                                                                                  |
| Comorbidities   | 44782690   | Chronic kidney disease stage 5 due to hypertension                                                                                                                                                                                                         |
| Measurements    | 2212090    | Basic metabolic panel (Calcium, total) This panel must include the following: Calcium, total (82310) Carbon dioxide (bicarbonate) (82374) Chloride (82435) Creatinine (82565) Glucose (82947) Potassium (84132) Sodium (84295) Urea nitrogen (BUN) (84520) |
| Measurements    | 2212186    | Albumin; serum, plasma or whole blood                                                                                                                                                                                                                      |
| Measurements    | 2212241    | Calcium; total                                                                                                                                                                                                                                             |
| Measurements    | 2212244    | Calcium; urine quantitative, timed specimen                                                                                                                                                                                                                |
| Measurements    | 2212284    | Cortisol; total                                                                                                                                                                                                                                            |
| Measurements    | 2212601    | Thyroid hormone (T3 or T4) uptake or thyroid hormone binding ratio (THBR)                                                                                                                                                                                  |
| Measurements    | 2213346    | Unlisted miscellaneous pathology test                                                                                                                                                                                                                      |
| Measurements    | 3000067    | Parathyrin.intact [Mass/volume] in Serum or Plasma                                                                                                                                                                                                         |
| Measurements    | 3006906    | Calcium [Mass/volume] in Serum or Plasma                                                                                                                                                                                                                   |
| Measurements    | 3014173    | Calcitriol [Mass/volume] in Serum or Plasma                                                                                                                                                                                                                |
| Measurements    | 3015377    | Calcium [Moles/volume] in Serum or Plasma                                                                                                                                                                                                                  |
| Measurements    | 3018311    | Urea nitrogen/Creatinine [Mass Ratio] in Serum or Plasma                                                                                                                                                                                                   |
| Measurements    | 3020029    | Reducing substances [Presence] in Urine                                                                                                                                                                                                                    |
| Measurements    | 3024250    | Calcium.ionized [Mass/volume] in Serum or Plasma by Ion-selective membrane electrode (ISE)                                                                                                                                                                 |
| Measurements    | 3025547    | Thyroglobulin Ab [Units/volume] in Serum or Plasma                                                                                                                                                                                                         |
| Measurements    | 4007831    | Vitamin D, 25-hydroxy measurement                                                                                                                                                                                                                          |
| Measurements    | 4017908    | Phosphate, inorganic measurement                                                                                                                                                                                                                           |

| KEEPER category       | Concept ID | Concept Name                                                                                                                                    |
|-----------------------|------------|-------------------------------------------------------------------------------------------------------------------------------------------------|
| Measurements          | 4034850    | Laboratory test                                                                                                                                 |
| Measurements          | 4141751    | Parathyroid hormone measurement                                                                                                                 |
| Measurements          | 4147378    | Calcitonin measurement                                                                                                                          |
| Measurements          | 4196731    | Total thyroxine measurement                                                                                                                     |
| Measurements          | 4196969    | T4 free measurement                                                                                                                             |
| Measurements          | 4219068    | Vitamin D, 1,25-dihydroxy measurement                                                                                                           |
| Measurements          | 4219426    | Thyroglobulin measurement                                                                                                                       |
| Measurements          | 4243005    | Magnesium measurement                                                                                                                           |
| Measurements          | 4246879    | Thyroid stimulating hormone measurement                                                                                                         |
| Measurements          | 46272910   | Measurement of ionized calcium in blood specimen                                                                                                |
| Diagnostic Procedures | 9201       | Inpatient Visit                                                                                                                                 |
| Diagnostic Procedures | 581477     | Office Visit                                                                                                                                    |
| Diagnostic Procedures | 2000265    | Closed [percutaneous] [needle] biopsy of thyroid gland                                                                                          |
| Diagnostic Procedures | 2000269    | Unilateral thyroid lobectomy                                                                                                                    |
| Diagnostic Procedures | 2000272    | Other partial thyroidectomy                                                                                                                     |
| Diagnostic Procedures | 2000282    | Other parathyroidectomy                                                                                                                         |
| Diagnostic Procedures | 2001292    | Laryngoscopy and other tracheoscopy                                                                                                             |
| Diagnostic Procedures | 2002307    | Simple excision of other lymphatic structure                                                                                                    |
| Diagnostic Procedures | 2002311    | Radical neck dissection, unilateral                                                                                                             |
| Diagnostic Procedures | 2007488    | Other radiotherapeutic procedure                                                                                                                |
| Diagnostic Procedures | 2008419    | Other miscellaneous procedures                                                                                                                  |
| Diagnostic Procedures | 2100740    | Anesthesia for all procedures on esophagus, thyroid, larynx, trachea and lymphatic system of neck; not otherwise specified, age 1 year or older |
| Diagnostic Procedures | 2101871    | Fine needle aspiration; with imaging guidance                                                                                                   |
| Diagnostic Procedures | 2106527    | Laryngoscopy, flexible; diagnostic                                                                                                              |
| Diagnostic Procedures | 2108115    | Collection of venous blood by venipuncture                                                                                                      |
| Diagnostic Procedures | 2108148    | Venous catheterization for selective organ blood sampling                                                                                       |
| Diagnostic Procedures | 2108471    | Dissection, deep jugular node(s)                                                                                                                |

| KEEPER category       | Concept ID | Concept Name                                                                                                      |
|-----------------------|------------|-------------------------------------------------------------------------------------------------------------------|
| Diagnostic Procedures | 2108482    | Cervical lymphadenectomy (modified radical neck dissection)                                                       |
| Diagnostic Procedures | 2110365    | Excision of cyst or adenoma of thyroid, or transection of isthmus                                                 |
| Diagnostic Procedures | 2110367    | Partial thyroid lobectomy, unilateral; with or without isthmusectomy                                              |
| Diagnostic Procedures | 2110369    | Total thyroid lobectomy, unilateral; with or without isthmusectomy                                                |
| Diagnostic Procedures | 2110370    | Total thyroid lobectomy, unilateral; with contralateral subtotal lobectomy, including isthmusectomy               |
| Diagnostic Procedures | 2110372    | Thyroidectomy, total or subtotal for malignancy; with limited neck dissection                                     |
| Diagnostic Procedures | 2110373    | Thyroidectomy, total or subtotal for malignancy; with radical neck dissection                                     |
| Diagnostic Procedures | 2110374    | Thyroidectomy, removal of all remaining thyroid tissue following previous removal of a portion of thyroid         |
| Diagnostic Procedures | 2110376    | Thyroidectomy, including substernal thyroid; cervical approach                                                    |
| Diagnostic Procedures | 2110383    | Parathyroidectomy or exploration of parathyroid(s)                                                                |
| Diagnostic Procedures | 2110384    | Parathyroidectomy or exploration of parathyroid(s); re-exploration                                                |
| Diagnostic Procedures | 2110386    | Parathyroid autotransplantation (List separately in addition to code for primary procedure)                       |
| Diagnostic Procedures | 2110387    | Thymectomy, partial or total; transcervical approach (separate procedure)                                         |
| Diagnostic Procedures | 2110396    | Unlisted procedure, endocrine system                                                                              |
| Diagnostic Procedures | 2110820    | Neuroplasty and/or transposition; cranial nerve (specify)                                                         |
| Diagnostic Procedures | 2211337    | Computed tomography, soft tissue neck; with contrast material(s)                                                  |
| Diagnostic Procedures | 2211359    | Radiologic examination, chest; single view, frontal                                                               |
| Diagnostic Procedures | 2211361    | Radiologic examination, chest, 2 views, frontal and lateral                                                       |
| Diagnostic Procedures | 2211727    | Unlisted diagnostic radiographic procedure                                                                        |
| Diagnostic Procedures | 2211737    | Ultrasound, soft tissues of head and neck (eg, thyroid, parathyroid, parotid), real time with image documentation |
| Diagnostic Procedures | 2211906    | Supervision, handling, loading of radiation source                                                                |
| Diagnostic Procedures | 2211909    | Thyroid uptake; single determination                                                                              |
| Diagnostic            | 2211912    | Thyroid imaging, with uptake; single determination                                                                |

| KEEPER category       | Concept ID | Concept Name                                                                                                                                                                                                                                                   |
|-----------------------|------------|----------------------------------------------------------------------------------------------------------------------------------------------------------------------------------------------------------------------------------------------------------------|
| Procedures            |            |                                                                                                                                                                                                                                                                |
| Diagnostic Procedures | 2211913    | Thyroid imaging, with uptake; multiple determinations                                                                                                                                                                                                          |
| Diagnostic Procedures | 2211914    | Thyroid imaging; only                                                                                                                                                                                                                                          |
| Diagnostic Procedures | 2211918    | Thyroid carcinoma metastases imaging; whole body                                                                                                                                                                                                               |
| Diagnostic Procedures | 2211919    | Thyroid carcinoma metastases uptake (List separately in addition to code for primary procedure)                                                                                                                                                                |
| Diagnostic Procedures | 2211920    | Parathyroid planar imaging (including subtraction, when performed)                                                                                                                                                                                             |
| Diagnostic Procedures | 2212051    | Injection procedure for radiopharmaceutical localization by non-imaging probe study, intravenous (eg, parathyroid adenoma)                                                                                                                                     |
| Diagnostic Procedures | 2212066    | Radiopharmaceutical therapy, by oral administration                                                                                                                                                                                                            |
| Diagnostic Procedures | 2212080    | Radiopharmaceutical therapy, unlisted procedure                                                                                                                                                                                                                |
| Diagnostic Procedures | 2213284    | Level V - Surgical pathology, gross and microscopic examination Adrenal, resection Bone - biopsy/curetings Bone fragment(s), pathologic fracture Brain, biopsy Brain/meninges, tumor resection Breast, excision of lesion, requiring microscopic evaluation of |
| Diagnostic Procedures | 2213296    | Pathology consultation during surgery; first tissue block, with frozen section(s), single specimen                                                                                                                                                             |
| Diagnostic Procedures | 2313870    | Echocardiography, transthoracic, real-time with image documentation (2D), includes M-mode recording, when performed, complete, without spectral or color Doppler echocardiography                                                                              |
| Diagnostic Procedures | 2314122    | Needle electromyography; larynx                                                                                                                                                                                                                                |
| Diagnostic Procedures | 2314125    | Needle electromyography; cranial nerve supplied muscles, bilateral                                                                                                                                                                                             |
| Diagnostic Procedures | 2314135    | Intraoperative neurophysiology testing, per hour (List separately in addition to code for primary procedure)                                                                                                                                                   |
| Diagnostic Procedures | 2740457    | Resection of Right Neck Lymphatic, Open Approach                                                                                                                                                                                                               |
| Diagnostic Procedures | 2740654    | Resection of Left Neck Lymphatic, Open Approach                                                                                                                                                                                                                |
| Diagnostic Procedures | 2749795    | Resection of Left Thyroid Gland Lobe, Open Approach                                                                                                                                                                                                            |
| Diagnostic Procedures | 2749797    | Resection of Right Thyroid Gland Lobe, Open Approach                                                                                                                                                                                                           |
| Diagnostic Procedures | 4004516    | Pre-surgery evaluation                                                                                                                                                                                                                                         |
| Diagnostic Procedures | 4064257    | Excision of regional lymph nodes                                                                                                                                                                                                                               |
| Diagnostic Procedures | 4073199    | Total thyroidectomy                                                                                                                                                                                                                                            |



| KEEPER category       | Concept ID | Concept Name                                                                                                   |
|-----------------------|------------|----------------------------------------------------------------------------------------------------------------|
| Diagnostic Procedures | 4120120    | Hemodialysis                                                                                                   |
| Diagnostic Procedures | 4141759    | Long-term drug therapy                                                                                         |
| Diagnostic Procedures | 4197217    | Arteriovenous anastomosis for renal dialysis                                                                   |
| Diagnostic Procedures | 4231441    | Excision of deep cervical lymph nodes                                                                          |
| Diagnostic Procedures | 4233827    | Biopsy of lymphatic structure                                                                                  |
| Diagnostic Procedures | 4289454    | Venous catheterization for renal dialysis                                                                      |
| Diagnostic Procedures | 4306780    | Gynecologic examination                                                                                        |
| Diagnostic Procedures | 40480674   | Preoperative cardiovascular examination                                                                        |
| Diagnostic Procedures | 42734948   | Radiopharmaceutical ablation of gland for thyroid carcinoma (Deprecated)                                       |
| Diagnostic Procedures | 42736574   | Introduction of needle or intracatheter; arteriovenous shunt created for dialysis (cannula, fistula, or graft) |
| Diagnostic Procedures | 42737560   | Screening mammography, bilateral (two view film study of each breast) (Deprecated)                             |
| Diagnostic Procedures | 42737977   | Angiography, arteriovenous shunt (eg, dialysis patient), radiological supervision and interpretation           |
| Diagnostic Procedures | 42738268   | Blood count; hemogram, automated, and manual differential WBC count (CBC) (Deprecated)                         |
| Diagnostic Procedures | 42738308   | Unlisted miscellaneous pathology test (Deprecated)                                                             |
| Diagnostic Procedures | 44782057   | DRAWING BLOOD FOR SPECIMEN (Deprecated)                                                                        |
| Drugs                 | 836208     | succinylcholine                                                                                                |
| Drugs                 | 1125315    | acetaminophen                                                                                                  |
| Drugs                 | 1501700    | levothyroxine                                                                                                  |
| Drugs                 | 1505346    | liothyronine                                                                                                   |
| Drugs                 | 19007721   | thyrotropin                                                                                                    |
| Drugs                 | 19035631   | calcitriol                                                                                                     |
| Drugs                 | 19037038   | calcium gluconate                                                                                              |
| Drugs                 | 19049909   | potassium iodide                                                                                               |
| Drugs                 | 19063297   | thyrotropin alfa                                                                                               |
| Drugs                 | 19069873   | sodium iodide                                                                                                  |
| <b>Osteoporosis</b>   |            |                                                                                                                |
| KEEPER category       | Concept ID | Concept Name                                                                                                   |

| KEEPER category       | Concept ID | Concept Name                                         |
|-----------------------|------------|------------------------------------------------------|
| Disease of Interest   | 80502      | Osteoporosis                                         |
| Alternative Diagnosis | 443392     | Malignant neoplastic disease                         |
| Comorbidities         | 75617      | Degenerative joint disease involving multiple joints |
| Comorbidities         | 77646      | Disorder of bone and articular cartilage             |
| Comorbidities         | 80767      | Breast lump                                          |
| Comorbidities         | 80816      | Degeneration of intervertebral disc                  |
| Comorbidities         | 81611      | Diverticular disease of colon                        |
| Comorbidities         | 193739     | Ovarian failure                                      |
| Comorbidities         | 312648     | Benign essential hypertension                        |
| Comorbidities         | 318800     | Gastroesophageal reflux disease                      |
| Comorbidities         | 319843     | Mitral valve disorder                                |
| Comorbidities         | 374009     | Organic mental disorder                              |
| Comorbidities         | 441628     | Menopausal and postmenopausal disorders              |
| Comorbidities         | 4059049    | Mammography abnormal                                 |
| Comorbidities         | 4113821    | Anxiety state                                        |
| Comorbidities         | 4172857    | Menopause finding                                    |
| Comorbidities         | 37017182   | Joint pain of pelvic region                          |
| Symptoms              | 74138      | Pathological fracture of vertebra                    |
| Symptoms              | 77646      | Disorder of bone and articular cartilage             |
| Symptoms              | 80816      | Degeneration of intervertebral disc                  |
| Symptoms              | 434500     | Closed fracture of neck of femur                     |
| Symptoms              | 443459     | Pathological fracture of neck of femur               |
| Symptoms              | 4170742    | Closed fracture of vertebral column                  |
| Symptoms              | 37017182   | Joint pain of pelvic region                          |
| Complications         | 75053      | Fracture of bone                                     |
| Complications         | 77646      | Disorder of bone and articular cartilage             |
| Drugs                 | 1511646    | pamidronate                                          |
| Drugs                 | 1512480    | ibandronate                                          |
| Drugs                 | 1513103    | raloxifene                                           |
| Drugs                 | 1516800    | risedronate                                          |
| Drugs                 | 1524674    | zoledronic acid                                      |
| Drugs                 | 1552929    | etidronate                                           |
| Drugs                 | 1557272    | alendronate                                          |
| Drugs                 | 19011064   | tiludronic acid                                      |
| Drugs                 | 19024249   | clodronic acid                                       |
| Drugs                 | 19115051   | risedronic acid                                      |
| Drugs                 | 40222444   | denosumab                                            |
| Drugs                 | 44506794   | bazedoxifene                                         |

| KEEPER category       | Concept ID | Concept Name                                                                                                                                                                                                                                                    |
|-----------------------|------------|-----------------------------------------------------------------------------------------------------------------------------------------------------------------------------------------------------------------------------------------------------------------|
| Measurements          | 3009220    | Epithelial cells.squamous [# /volume] in Urine sediment                                                                                                                                                                                                         |
| Measurements          | 4007831    | Vitamin D, 25-hydroxy measurement                                                                                                                                                                                                                               |
| Measurements          | 4018619    | Screening for occult blood in feces                                                                                                                                                                                                                             |
| Measurements          | 4034850    | Laboratory test                                                                                                                                                                                                                                                 |
| Measurements          | 4062484    | Screening for malignant neoplasm of cervix                                                                                                                                                                                                                      |
| Measurements          | 4077697    | Screening mammography                                                                                                                                                                                                                                           |
| Measurements          | 4114314    | Screening for osteoporosis                                                                                                                                                                                                                                      |
| Measurements          | 4152047    | Hyperlipidemia screening                                                                                                                                                                                                                                        |
| Measurements          | 4171430    | Screening for malignant neoplasm of rectum                                                                                                                                                                                                                      |
| Measurements          | 4175226    | Screening for malignant neoplasm of colon                                                                                                                                                                                                                       |
| Measurements          | 4246879    | Thyroid stimulating hormone measurement                                                                                                                                                                                                                         |
| Measurements          | 4262119    | Human papillomavirus DNA detection                                                                                                                                                                                                                              |
| Diagnostic Procedures | 0          | No matching concept                                                                                                                                                                                                                                             |
| Diagnostic Procedures | 9201       | Inpatient Visit                                                                                                                                                                                                                                                 |
| Diagnostic Procedures | 2008419    | Other miscellaneous procedures                                                                                                                                                                                                                                  |
| Diagnostic Procedures | 2211359    | Radiologic examination, chest; single view, frontal                                                                                                                                                                                                             |
| Diagnostic Procedures | 2211361    | Radiologic examination, chest, 2 views, frontal and lateral                                                                                                                                                                                                     |
| Diagnostic Procedures | 2211439    | Radiological supervision and interpretation, percutaneous vertebroplasty, vertebral augmentation, or sacral augmentation (sacroplasty), including cavity creation, per vertebral body or sacrum; under fluoroscopic guidance                                    |
| Diagnostic Procedures | 2211473    | Radiologic examination, hip, unilateral; complete, minimum of 2 views                                                                                                                                                                                           |
| Diagnostic Procedures | 2211727    | Unlisted diagnostic radiographic procedure                                                                                                                                                                                                                      |
| Diagnostic Procedures | 2211739    | Ultrasound, breast(s) (unilateral or bilateral), real time with image documentation                                                                                                                                                                             |
| Diagnostic Procedures | 2211808    | Computer-aided detection (computer algorithm analysis of digital image data for lesion detection) with further review for interpretation, with or without digitization of film radiographic images; diagnostic mammography (List separately in addition to code |
| Diagnostic Procedures | 2211809    | Computer-aided detection (computer algorithm analysis of digital image data for lesion detection) with further review for interpretation, with or without digitization of film radiographic images; screening mammography (List separately in addition to code  |
| Diagnostic Procedures | 2211814    | Screening mammography, bilateral (2-view study of each breast)                                                                                                                                                                                                  |
| Diagnostic Procedures | 2213221    | Cytopathology, cervical or vaginal (any reporting system), collected in preservative fluid, automated thin layer preparation; manual screening under physician supervision                                                                                      |

| KEEPER category       | Concept ID | Concept Name                                                                                                                                                                                                                                                    |
|-----------------------|------------|-----------------------------------------------------------------------------------------------------------------------------------------------------------------------------------------------------------------------------------------------------------------|
| Diagnostic Procedures | 2313870    | Echocardiography, transthoracic, real-time with image documentation (2D), includes M-mode recording, when performed, complete, without spectral or color Doppler echocardiography                                                                               |
| Diagnostic Procedures | 4004516    | Pre-surgery evaluation                                                                                                                                                                                                                                          |
| Diagnostic Procedures | 4036803    | General examination of patient                                                                                                                                                                                                                                  |
| Diagnostic Procedures | 4052851    | Transmission bone density study                                                                                                                                                                                                                                 |
| Diagnostic Procedures | 4141759    | Long-term drug therapy                                                                                                                                                                                                                                          |
| Diagnostic Procedures | 4159841    | Closed reduction of fracture of femur with internal fixation                                                                                                                                                                                                    |
| Diagnostic Procedures | 4211987    | Open reduction of fracture of femur with internal fixation                                                                                                                                                                                                      |
| Diagnostic Procedures | 4297365    | Partial hip replacement by prosthesis                                                                                                                                                                                                                           |
| Diagnostic Procedures | 4306780    | Gynecologic examination                                                                                                                                                                                                                                         |
| Diagnostic Procedures | 42737560   | Screening mammography, bilateral (two view film study of each breast) (Deprecated)                                                                                                                                                                              |
| Diagnostic Procedures | 42738270   | Blood count; hemogram and platelet count, automated, and automated partial differential WBC count (CBC) (Deprecated)                                                                                                                                            |
| Diagnostic Procedures | 42738308   | Unlisted miscellaneous pathology test (Deprecated)                                                                                                                                                                                                              |
| Diagnostic Procedures | 42739102   | Dual energy x-ray absorptiometry (DEXA), bone density study, one or more sites; axial skeleton (eg, hips, pelvis, spine) (Deprecated)                                                                                                                           |
| Diagnostic Procedures | 42739103   | Dual energy x-ray absorptiometry (DEXA), bone density study, one or more sites; appendicular skeleton (peripheral) (eg, radius, wrist, heel) (Deprecated)                                                                                                       |
| Diagnostic Procedures | 42739824   | Digitization of film radiographic images with computer analysis for lesion detection and further physician review for interpretation, screening mammography (List separately in addition to code for primary procedure) (Deprecated)                            |
| Diagnostic Procedures | 42740538   | Computer aided detection (computer algorithm analysis of digital image data for lesion detection) with further physician review for interpretation, with or without digitization of film radiographic images; screening mammography (List separ... (Deprecated) |
| Diagnostic Procedures | 42740642   | Dual energy x-ray absorptiometry (DXA), bone density study, one or more sites; vertebral fracture assessment (Deprecated)                                                                                                                                       |
| Diagnostic Procedures | 44782057   | DRAWING BLOOD FOR SPECIMEN (Deprecated)                                                                                                                                                                                                                         |

#### Rheumatoid arthritis

| KEEPER category | Concept ID | Concept Name |
|-----------------|------------|--------------|
|-----------------|------------|--------------|

| KEEPER category       | Concept ID | Concept Name                                                                                                      |
|-----------------------|------------|-------------------------------------------------------------------------------------------------------------------|
| Disease of Interest   | 80809      | Rheumatoid arthritis                                                                                              |
| Disease of Interest   | 2107558    | Rheumatoid arthritis (RA) disease activity, low (RA)                                                              |
| Disease of Interest   | 2107559    | Rheumatoid arthritis (RA) disease activity, moderate (RA)                                                         |
| Disease of Interest   | 2107560    | Rheumatoid arthritis (RA) disease activity, high (RA)                                                             |
| Disease of Interest   | 2107561    | Disease prognosis for rheumatoid arthritis assessed, poor prognosis documented (RA)                               |
| Disease of Interest   | 2107572    | Disease prognosis for rheumatoid arthritis assessed, good prognosis documented (RA)                               |
| Disease of Interest   | 2108721    | Patient receiving first-time biologic disease modifying anti-rheumatic drug therapy for rheumatoid arthritis (RA) |
| Disease of Interest   | 4035611    | Seropositive rheumatoid arthritis                                                                                 |
| Disease of Interest   | 4083556    | Seronegative rheumatoid arthritis                                                                                 |
| Disease of Interest   | 4102493    | Polyneuropathy in rheumatoid arthritis                                                                            |
| Disease of Interest   | 4107913    | Myopathy due to rheumatoid arthritis                                                                              |
| Disease of Interest   | 4297650    | Cutaneous atrophy due to rheumatoid arthritis                                                                     |
| Disease of Interest   | 4334806    | Deformity of foot due to rheumatoid arthritis                                                                     |
| Disease of Interest   | 46273442   | Deformity of hand due to rheumatoid arthritis                                                                     |
| Alternative Diagnosis | 73553      | Arthropathy                                                                                                       |
| Alternative Diagnosis | 137275     | Disorder of muscle                                                                                                |
| Alternative Diagnosis | 140168     | Psoriasis                                                                                                         |
| Alternative Diagnosis | 255334     | Collagen disease                                                                                                  |
| Alternative Diagnosis | 434621     | Autoimmune disease                                                                                                |
| Alternative Diagnosis | 4143972    | Raynaud's phenomenon                                                                                              |
| Symptoms              | 73553      | Arthropathy                                                                                                       |
| Symptoms              | 77074      | Joint pain                                                                                                        |
| Symptoms              | 133299     | Swelling of limb                                                                                                  |
| Symptoms              | 138525     | Pain in limb                                                                                                      |
| Symptoms              | 4013526    | ESR raised                                                                                                        |

| KEEPER category | Concept ID | Concept Name                                                          |
|-----------------|------------|-----------------------------------------------------------------------|
| Symptoms        | 4027396    | Peripheral neuritis                                                   |
| Symptoms        | 4090425    | Altered sensation of skin                                             |
| Comorbidities   | 255334     | Collagen disease                                                      |
| Comorbidities   | 318800     | Gastroesophageal reflux disease                                       |
| Comorbidities   | 319843     | Mitral valve disorder                                                 |
| Comorbidities   | 434621     | Autoimmune disease                                                    |
| Comorbidities   | 437264     | Tobacco dependence syndrome                                           |
| Comorbidities   | 4113821    | Anxiety state                                                         |
| Comorbidities   | 4143972    | Raynaud's phenomenon                                                  |
| Comorbidities   | 4172857    | Menopause finding                                                     |
| Drugs           | 912263     | certolizumab pegol                                                    |
| Drugs           | 937368     | infliximab                                                            |
| Drugs           | 964339     | sulfasalazine                                                         |
| Drugs           | 1119119    | adalimumab                                                            |
| Drugs           | 1151789    | etanercept                                                            |
| Drugs           | 1153664    | propoxyphene                                                          |
| Drugs           | 1305058    | methotrexate                                                          |
| Drugs           | 1777087    | hydroxychloroquine                                                    |
| Drugs           | 19041065   | golimumab                                                             |
| Drugs           | 19111620   | folic acid                                                            |
| Measurements    | 3000620    | Complement C3 [Mass/volume] in Serum or Plasma                        |
| Measurements    | 3000905    | Leukocytes [# /volume] in Blood by Automated count                    |
| Measurements    | 3000963    | Hemoglobin [Mass/volume] in Blood                                     |
| Measurements    | 3008898    | HLA-B27 [Presence]                                                    |
| Measurements    | 3009220    | Epithelial cells.squamous [# /volume] in Urine sediment               |
| Measurements    | 3009744    | MCHC [Mass/volume] by Automated count                                 |
| Measurements    | 3010645    | SCL-70 extractable nuclear Ab [Units/volume] in Serum                 |
| Measurements    | 3016520    | Beta globulin [Mass/volume] in Serum or Plasma by Electrophoresis     |
| Measurements    | 3016921    | Smith extractable nuclear Ab [Units/volume] in Serum                  |
| Measurements    | 3017766    | Complement C4 [Mass/volume] in Serum or Plasma                        |
| Measurements    | 3020416    | Erythrocytes [# /volume] in Blood by Automated count                  |
| Measurements    | 3022113    | Urinalysis microscopic panel - Urine sediment                         |
| Measurements    | 3023314    | Hematocrit [Volume Fraction] of Blood by Automated count              |
| Measurements    | 3024536    | Nuclear Ab pattern [Interpretation] in Serum by Immunofluorescence    |
| Measurements    | 3027184    | Lupus anticoagulant [Interpretation] in Platelet poor plasma          |
| Measurements    | 3027450    | Sjogrens syndrome-B extractable nuclear Ab [Units/volume] in Serum    |
| Measurements    | 3030367    | Cyclic citrullinated peptide IgG Ab [Units/volume] in Serum or Plasma |
| Measurements    | 3033159    | Nuclear IgG Ab [Units/volume] in Serum by Flow cytometry (FC)         |
| Measurements    | 3036779    | HLA-B27 [Presence] by NAA with probe detection                        |
| Measurements    | 3039162    | Centromere protein B Ab [Units/volume] in Serum                       |

| KEEPER category       | Concept ID | Concept Name                                                                                                                                                                      |
|-----------------------|------------|-----------------------------------------------------------------------------------------------------------------------------------------------------------------------------------|
| Measurements          | 3040168    | Immature granulocytes [# /volume] in Blood                                                                                                                                        |
| Measurements          | 4018467    | Measurement of Borrelia burgdorferi antibody                                                                                                                                      |
| Measurements          | 4156643    | Blood urate measurement                                                                                                                                                           |
| Measurements          | 4196218    | Aldolase measurement                                                                                                                                                              |
| Measurements          | 4208414    | C-reactive protein measurement                                                                                                                                                    |
| Measurements          | 4234494    | Angiotensin converting enzyme measurement                                                                                                                                         |
| Measurements          | 4319466    | Complete blood count with white cell differential, automated                                                                                                                      |
| Measurements          | 40760212   | Cyclic citrullinated peptide IgA+IgG Ab [Units/volume] in Serum or Plasma by Immunoassay                                                                                          |
| Complications         | 75897      | Polyarthropathy                                                                                                                                                                   |
| Complications         | 77074      | Joint pain                                                                                                                                                                        |
| Complications         | 78227      | Degenerative joint disease of hand                                                                                                                                                |
| Complications         | 138525     | Pain in limb                                                                                                                                                                      |
| Complications         | 255334     | Collagen disease                                                                                                                                                                  |
| Complications         | 4143972    | Raynaud's phenomenon                                                                                                                                                              |
| Complications         | 4272240    | Malaise                                                                                                                                                                           |
| Diagnostic Procedures | 9201       | Inpatient Visit                                                                                                                                                                   |
| Diagnostic Procedures | 581477     | Office Visit                                                                                                                                                                      |
| Diagnostic Procedures | 2008419    | Other miscellaneous procedures                                                                                                                                                    |
| Diagnostic Procedures | 2108115    | Collection of venous blood by venipuncture                                                                                                                                        |
| Diagnostic Procedures | 2211359    | Radiologic examination, chest; single view, frontal                                                                                                                               |
| Diagnostic Procedures | 2211361    | Radiologic examination, chest, 2 views, frontal and lateral                                                                                                                       |
| Diagnostic Procedures | 2211458    | Radiologic examination, hand; 2 views                                                                                                                                             |
| Diagnostic Procedures | 2211459    | Radiologic examination, hand; minimum of 3 views                                                                                                                                  |
| Diagnostic Procedures | 2211473    | Radiologic examination, hip, unilateral; complete, minimum of 2 views                                                                                                             |
| Diagnostic Procedures | 2211490    | Radiologic examination, foot; 2 views                                                                                                                                             |
| Diagnostic Procedures | 2211727    | Unlisted diagnostic radiographic procedure                                                                                                                                        |
| Diagnostic Procedures | 2212477    | Molecular diagnostics; dot/slot blot production, each nucleic acid preparation                                                                                                    |
| Diagnostic Procedures | 2313870    | Echocardiography, transthoracic, real-time with image documentation (2D), includes M-mode recording, when performed, complete, without spectral or color Doppler echocardiography |
| Diagnostic            | 4004516    | Pre-surgery evaluation                                                                                                                                                            |

| KEEPER category       | Concept ID | Concept Name                                                                                                         |
|-----------------------|------------|----------------------------------------------------------------------------------------------------------------------|
| Procedures            |            |                                                                                                                      |
| Diagnostic Procedures | 4141759    | Long-term drug therapy                                                                                               |
| Diagnostic Procedures | 4306780    | Gynecologic examination                                                                                              |
| Diagnostic Procedures | 42738269   | Blood count; hemogram and platelet count, automated, and manual differential WBC count (CBC) (Deprecated)            |
| Diagnostic Procedures | 42738270   | Blood count; hemogram and platelet count, automated, and automated partial differential WBC count (CBC) (Deprecated) |
| Diagnostic Procedures | 42738308   | Unlisted miscellaneous pathology test (Deprecated)                                                                   |
| Diagnostic Procedures | 44782057   | DRAWING BLOOD FOR SPECIMEN (Deprecated)                                                                              |

#### Viral hepatitis type A

| KEEPER category       | Concept ID | Concept Name                               |
|-----------------------|------------|--------------------------------------------|
| Disease of Interest   | 194856     | Hepatic coma due to viral hepatitis A      |
| Disease of Interest   | 4013974    | Hepatitis A test positive                  |
| Disease of Interest   | 4223947    | Viral hepatitis, type A                    |
| Complications         | 192956     | Cholecystitis                              |
| Complications         | 194692     | Cirrhosis - non-alcoholic                  |
| Complications         | 194990     | Inflammatory disease of liver              |
| Complications         | 197320     | Acute renal failure syndrome               |
| Complications         | 4029488    | Hepatic encephalopathy                     |
| Alternative Diagnosis | 24966      | Esophageal varices                         |
| Alternative Diagnosis | 137977     | Jaundice                                   |
| Alternative Diagnosis | 192240     | Chronic viral hepatitis B with hepatitis D |
| Alternative Diagnosis | 192242     | Acute hepatitis C                          |
| Alternative Diagnosis | 193693     | Viral hepatitis without hepatic coma       |
| Alternative Diagnosis | 194692     | Cirrhosis - non-alcoholic                  |
| Alternative Diagnosis | 194856     | Hepatic coma due to viral hepatitis A      |
| Alternative Diagnosis | 194990     | Inflammatory disease of liver              |
| Alternative           | 196625     | Viral hepatitis A without hepatic coma     |



| KEEPER category       | Concept ID | Concept Name                                                 |
|-----------------------|------------|--------------------------------------------------------------|
| Diagnosis             |            |                                                              |
| Alternative Diagnosis | 197493     | Hepatitis D superinfection of hepatitis B carrier            |
| Alternative Diagnosis | 197494     | Viral hepatitis C                                            |
| Alternative Diagnosis | 197795     | Acute type B viral hepatitis                                 |
| Alternative Diagnosis | 198683     | Viral hepatitis B without hepatic coma                       |
| Alternative Diagnosis | 198964     | Chronic hepatitis C                                          |
| Alternative Diagnosis | 198978     | Acute gonorrhoea of lower genitourinary tract                |
| Alternative Diagnosis | 200031     | Hepatic coma due to viral hepatitis B                        |
| Alternative Diagnosis | 200527     | Splenomegaly                                                 |
| Alternative Diagnosis | 201343     | Acute alcoholic liver disease                                |
| Alternative Diagnosis | 201613     | Chronic nonalcoholic liver disease                           |
| Alternative Diagnosis | 436238     | Elevated level of transaminase and lactic acid dehydrogenase |
| Alternative Diagnosis | 437264     | Tobacco dependence syndrome                                  |
| Alternative Diagnosis | 437784     | Infectious mononucleosis                                     |
| Alternative Diagnosis | 439672     | Hepatic coma due to viral hepatitis C                        |
| Alternative Diagnosis | 439674     | Chronic viral hepatitis B without delta-agent                |
| Alternative Diagnosis | 439727     | Human immunodeficiency virus infection                       |
| Alternative Diagnosis | 439926     | Malaise and fatigue                                          |
| Alternative Diagnosis | 444367     | Cholelithiasis without obstruction                           |
| Alternative Diagnosis | 763021     | Chronic viral hepatitis C with hepatic coma                  |
| Alternative Diagnosis | 4015842    | Viral hepatitis carrier                                      |
| Alternative Diagnosis | 4029488    | Hepatic encephalopathy                                       |
| Alternative Diagnosis | 4043371    | Inflammatory disorder of digestive tract                     |

| KEEPER category       | Concept ID | Concept Name                                                 |
|-----------------------|------------|--------------------------------------------------------------|
| Alternative Diagnosis | 4111998    | Esophageal varices associated with another disorder          |
| Alternative Diagnosis | 4149084    | Vaginitis                                                    |
| Alternative Diagnosis | 4291005    | Viral hepatitis                                              |
| Alternative Diagnosis | 4337543    | Hepatic necrosis                                             |
| Alternative Diagnosis | 4340379    | Hepatitis B carrier                                          |
| Alternative Diagnosis | 4340380    | Hepatitis C carrier                                          |
| Alternative Diagnosis | 40481531   | Sequela of chronic liver disease                             |
| Alternative Diagnosis | 45757141   | Viral hepatitis in mother complicating childbirth            |
| Alternative Diagnosis | 46270037   | Hepatic coma due to acute hepatitis C                        |
| Symptoms              | 27674      | Nausea and vomiting                                          |
| Symptoms              | 31967      | Nausea                                                       |
| Symptoms              | 137977     | Jaundice                                                     |
| Symptoms              | 200219     | Abdominal pain                                               |
| Symptoms              | 200528     | Ascites                                                      |
| Symptoms              | 436238     | Elevated level of transaminase and lactic acid dehydrogenase |
| Symptoms              | 439926     | Malaise and fatigue                                          |
| Symptoms              | 441408     | Vomiting                                                     |
| Symptoms              | 4047791    | Abnormal body temperature                                    |
| Comorbidities         | 24966      | Esophageal varices                                           |
| Comorbidities         | 78818      | Large fetus causing disproportion with antenatal problem     |
| Comorbidities         | 81611      | Diverticular disease of colon                                |
| Comorbidities         | 194692     | Cirrhosis - non-alcoholic                                    |
| Comorbidities         | 194990     | Inflammatory disease of liver                                |
| Comorbidities         | 195209     | Benign neoplasm of liver and/or biliary ducts                |
| Comorbidities         | 196170     | Liver disorder in pregnancy - delivered                      |
| Comorbidities         | 196436     | Internal hemorrhoids                                         |
| Comorbidities         | 196463     | Alcoholic cirrhosis                                          |
| Comorbidities         | 197917     | Disorder of biliary tract                                    |
| Comorbidities         | 198978     | Acute gonorrhoea of lower genitourinary tract                |
| Comorbidities         | 200527     | Splenomegaly                                                 |
| Comorbidities         | 200528     | Ascites                                                      |
| Comorbidities         | 201072     | Benign prostatic hyperplasia without outflow obstruction     |
| Comorbidities         | 201343     | Acute alcoholic liver disease                                |

| KEEPER category | Concept ID | Concept Name                                                                                                                        |
|-----------------|------------|-------------------------------------------------------------------------------------------------------------------------------------|
| Comorbidities   | 201613     | Chronic nonalcoholic liver disease                                                                                                  |
| Comorbidities   | 253954     | Pulmonary tuberculosis                                                                                                              |
| Comorbidities   | 318800     | Gastroesophageal reflux disease                                                                                                     |
| Comorbidities   | 437264     | Tobacco dependence syndrome                                                                                                         |
| Comorbidities   | 437784     | Infectious mononucleosis                                                                                                            |
| Comorbidities   | 439727     | Human immunodeficiency virus infection                                                                                              |
| Comorbidities   | 443410     | Infective pneumonia                                                                                                                 |
| Comorbidities   | 4015842    | Viral hepatitis carrier                                                                                                             |
| Comorbidities   | 4029488    | Hepatic encephalopathy                                                                                                              |
| Comorbidities   | 4043371    | Inflammatory disorder of digestive tract                                                                                            |
| Comorbidities   | 4113821    | Anxiety state                                                                                                                       |
| Comorbidities   | 4151863    | Congenital abnormality of liver and/or biliary tract                                                                                |
| Comorbidities   | 4273323    | Rubella                                                                                                                             |
| Comorbidities   | 4337543    | Hepatic necrosis                                                                                                                    |
| Comorbidities   | 40481531   | Sequela of chronic liver disease                                                                                                    |
| Drugs           | 1714165    | peginterferon alfa-2a                                                                                                               |
| Drugs           | 1762711    | ribavirin                                                                                                                           |
| Drugs           | 1797155    | peginterferon alfa-2b                                                                                                               |
| Measurements    | 2213126    | Infectious agent detection by nucleic acid (DNA or RNA); hepatitis B virus, amplified probe technique                               |
| Measurements    | 2213127    | Infectious agent detection by nucleic acid (DNA or RNA); hepatitis B virus, quantification                                          |
| Measurements    | 2213130    | Infectious agent detection by nucleic acid (DNA or RNA); hepatitis C, quantification, includes reverse transcription when performed |
| Measurements    | 2213142    | Infectious agent detection by nucleic acid (DNA or RNA); HIV-1, quantification, includes reverse transcription when performed       |
| Measurements    | 3000905    | Leukocytes [# /volume] in Blood by Automated count                                                                                  |
| Measurements    | 3000963    | Hemoglobin [Mass/volume] in Blood                                                                                                   |
| Measurements    | 3003215    | Lymphocytes [# /volume] in Blood by Manual count                                                                                    |
| Measurements    | 3003470    | Hepatitis C virus Ab [Units/volume] in Serum by Immunoassay                                                                         |
| Measurements    | 3003974    | HIV 1 IgG Ab [Presence] in Serum                                                                                                    |
| Measurements    | 3006453    | Hepatitis B virus surface Ab [Presence] in Serum by Immunoassay                                                                     |
| Measurements    | 3006923    | Alanine aminotransferase [Enzymatic activity/volume] in Serum or Plasma                                                             |
| Measurements    | 3007359    | Bilirubin.indirect [Mass/volume] in Serum or Plasma                                                                                 |
| Measurements    | 3009220    | Epithelial cells.squamous [# /volume] in Urine sediment                                                                             |
| Measurements    | 3009744    | MCHC [Mass/volume] by Automated count                                                                                               |
| Measurements    | 3010229    | Hepatitis B virus core IgM Ab [Units/volume] in Serum or Plasma by Immunoassay                                                      |
| Measurements    | 3011516    | Hepatitis B virus e Ag [Units/volume] in Serum by Immunoassay                                                                       |
| Measurements    | 3012030    | MCH [Entitic mass] by Automated count                                                                                               |

| KEEPER category | Concept ID | Concept Name                                                                                         |
|-----------------|------------|------------------------------------------------------------------------------------------------------|
| Measurements    | 3013721    | Aspartate aminotransferase [Enzymatic activity/volume] in Serum or Plasma                            |
| Measurements    | 3016557    | Hepatitis B virus core Ab [Units/volume] in Serum by Immunoassay                                     |
| Measurements    | 3018447    | Hepatitis C virus RNA [Units/volume] (viral load) in Serum or Plasma by NAA with probe detection     |
| Measurements    | 3018867    | Mumps virus IgG Ab [Units/volume] in Serum                                                           |
| Measurements    | 3019510    | Hepatitis B virus surface Ag [Presence] in Serum or Plasma by Immunoassay                            |
| Measurements    | 3019676    | Bilirubin.conjugated [Mass/volume] in Serum or Plasma                                                |
| Measurements    | 3020029    | Reducing substances [Presence] in Urine                                                              |
| Measurements    | 3020316    | Hepatitis A virus IgM Ab [Presence] in Serum or Plasma by Immunoassay                                |
| Measurements    | 3020416    | Erythrocytes [# /volume] in Blood by Automated count                                                 |
| Measurements    | 3020509    | Albumin/Globulin [Mass Ratio] in Serum or Plasma                                                     |
| Measurements    | 3020630    | Protein [Mass/volume] in Serum or Plasma                                                             |
| Measurements    | 3022113    | Urinalysis microscopic panel - Urine sediment                                                        |
| Measurements    | 3022560    | Hepatitis B virus core IgM Ab [Presence] in Serum or Plasma by Immunoassay                           |
| Measurements    | 3023314    | Hematocrit [Volume Fraction] of Blood by Automated count                                             |
| Measurements    | 3023378    | Hepatitis B virus e Ag [Presence] in Serum or Plasma by Immunoassay                                  |
| Measurements    | 3023599    | MCV [Entitic volume] by Automated count                                                              |
| Measurements    | 3023884    | Cholesterol in HDL/Cholesterol.total [Mass Ratio] in Serum or Plasma                                 |
| Measurements    | 3024128    | Bilirubin.total [Mass/volume] in Serum or Plasma                                                     |
| Measurements    | 3024557    | Polymorphonuclear cells/100 leukocytes in Blood by Manual count                                      |
| Measurements    | 3024561    | Albumin [Mass/volume] in Serum or Plasma                                                             |
| Measurements    | 3024929    | Platelets [# /volume] in Blood by Automated count                                                    |
| Measurements    | 3027245    | Hepatitis A virus IgM Ab [Units/volume] in Serum by Immunoassay                                      |
| Measurements    | 3027346    | Hepatitis B virus DNA [# /volume] (viral load) in Serum or Plasma by NAA with probe detection        |
| Measurements    | 3028089    | Alkaline phosphatase isoenzyme [Units/volume] in Serum or Plasma                                     |
| Measurements    | 3028662    | Hepatitis A virus Ab [Units/volume] in Serum or Plasma by Immunoassay                                |
| Measurements    | 3031004    | Mononuclear cells/100 leukocytes in Blood by Manual count                                            |
| Measurements    | 3031806    | HLA-B*57:01 [Presence] in Specimen                                                                   |
| Measurements    | 3034868    | Hepatitis C virus RNA [log units/volume] (viral load) in Serum or Plasma by NAA with probe detection |
| Measurements    | 3035456    | Hepatitis A virus Ab [Presence] in Serum by Immunoassay                                              |
| Measurements    | 3035962    | HIV 1+2 Ab [Presence] in Serum or Plasma by Immunoassay                                              |
| Measurements    | 3035995    | Alkaline phosphatase [Enzymatic activity/volume] in Serum or Plasma                                  |
| Measurements    | 3036282    | Hepatitis B virus core Ab [Presence] in Serum or Plasma by Immunoassay                               |
| Measurements    | 3039218    | Hepatitis A virus Ab [Interpretation] in Serum                                                       |
| Measurements    | 3049147    | HIV 1+0+2 Ab [Units/volume] in Serum or Plasma                                                       |
| Measurements    | 3053246    | HIV 1+0+2 Ab [Presence] in Serum or Plasma                                                           |

| KEEPER category       | Concept ID | Concept Name                                                                                   |
|-----------------------|------------|------------------------------------------------------------------------------------------------|
| Measurements          | 4014768    | Alpha-1-fetoprotein measurement, serum                                                         |
| Measurements          | 4034850    | Laboratory test                                                                                |
| Measurements          | 4062484    | Screening for malignant neoplasm of cervix                                                     |
| Measurements          | 4064905    | Venereal disease screening                                                                     |
| Measurements          | 4098519    | LDH blood measurement                                                                          |
| Measurements          | 4175226    | Screening for malignant neoplasm of colon                                                      |
| Measurements          | 4216632    | Bilirubin, direct measurement                                                                  |
| Measurements          | 4245982    | Ammonia measurement                                                                            |
| Measurements          | 4276028    | Amylase measurement                                                                            |
| Measurements          | 4289475    | Gamma glutamyl transferase measurement                                                         |
| Measurements          | 4319466    | Complete blood count with white cell differential, automated                                   |
| Measurements          | 4324147    | Alpha-1-antitrypsin measurement                                                                |
| Measurements          | 4337961    | Ceruloplasmin measurement                                                                      |
| Diagnostic Procedures | 0          | No matching concept                                                                            |
| Diagnostic Procedures | 9201       | Inpatient Visit                                                                                |
| Diagnostic Procedures | 581477     | Office Visit                                                                                   |
| Diagnostic Procedures | 2002449    | Endoscopic excision or destruction of lesion or tissue of esophagus                            |
| Diagnostic Procedures | 2003287    | Endoscopic sphincterotomy and papillotomy                                                      |
| Diagnostic Procedures | 2006932    | Diagnostic ultrasound of abdomen and retroperitoneum                                           |
| Diagnostic Procedures | 2008008    | Continuous invasive mechanical ventilation for less than 96 consecutive hours                  |
| Diagnostic Procedures | 2008419    | Other miscellaneous procedures                                                                 |
| Diagnostic Procedures | 2100978    | Anesthesia for lower intestinal endoscopic procedures, endoscope introduced distal to duodenum |
| Diagnostic Procedures | 2108329    | Transcatheter biopsy                                                                           |
| Diagnostic Procedures | 2211359    | Radiologic examination, chest; single view, frontal                                            |
| Diagnostic Procedures | 2211361    | Radiologic examination, chest, 2 views, frontal and lateral                                    |
| Diagnostic Procedures | 2211424    | Computed tomography, pelvis; with contrast material(s)                                         |
| Diagnostic Procedures | 2211506    | Radiologic examination, abdomen; single anteroposterior view                                   |
| Diagnostic Procedures | 2211511    | Computed tomography, abdomen; with contrast material(s)                                        |
| Diagnostic            | 2211512    | Computed tomography, abdomen; without contrast material, followed by                           |

| KEEPER category       | Concept ID | Concept Name                                                                                                                                                                      |
|-----------------------|------------|-----------------------------------------------------------------------------------------------------------------------------------------------------------------------------------|
| Procedures            |            | contrast material(s) and further sections                                                                                                                                         |
| Diagnostic Procedures | 2211655    | Transcatheter biopsy, radiological supervision and interpretation                                                                                                                 |
| Diagnostic Procedures | 2211727    | Unlisted diagnostic radiographic procedure                                                                                                                                        |
| Diagnostic Procedures | 2211740    | Ultrasound, abdominal, real time with image documentation; complete                                                                                                               |
| Diagnostic Procedures | 2211741    | Ultrasound, abdominal, real time with image documentation; limited (eg, single organ, quadrant, follow-up)                                                                        |
| Diagnostic Procedures | 2213418    | Immunization administration (includes percutaneous, intradermal, subcutaneous, or intramuscular injections); 1 vaccine (single or combination vaccine/toxoid)                     |
| Diagnostic Procedures | 2313870    | Echocardiography, transthoracic, real-time with image documentation (2D), includes M-mode recording, when performed, complete, without spectral or color Doppler echocardiography |
| Diagnostic Procedures | 4004516    | Pre-surgery evaluation                                                                                                                                                            |
| Diagnostic Procedures | 4013354    | Insertion of endotracheal tube                                                                                                                                                    |
| Diagnostic Procedures | 4036803    | General examination of patient                                                                                                                                                    |
| Diagnostic Procedures | 4119971    | Vascular cannula adjustment                                                                                                                                                       |
| Diagnostic Procedures | 4120443    | Bone marrow sampling                                                                                                                                                              |
| Diagnostic Procedures | 4123999    | Percutaneous needle biopsy of liver                                                                                                                                               |
| Diagnostic Procedures | 4166920    | Endoscopic biopsy of rectum                                                                                                                                                       |
| Diagnostic Procedures | 4167261    | Bronchoscopy and biopsy of bronchus                                                                                                                                               |
| Diagnostic Procedures | 4216752    | Drug therapy                                                                                                                                                                      |
| Diagnostic Procedures | 4231419    | Abdominal paracentesis                                                                                                                                                            |
| Diagnostic Procedures | 4286821    | Anesthesia for upper gastrointestinal endoscopic procedure                                                                                                                        |
| Diagnostic Procedures | 4289454    | Venous catheterization for renal dialysis                                                                                                                                         |
| Diagnostic Procedures | 4306780    | Gynecologic examination                                                                                                                                                           |
| Diagnostic Procedures | 42738267   | Blood count; hemogram, automated (RBC, WBC, Hgb, Hct and indices only) (Deprecated)                                                                                               |
| Diagnostic Procedures | 42738268   | Blood count; hemogram, automated, and manual differential WBC count (CBC) (Deprecated)                                                                                            |
| Diagnostic            | 42738269   | Blood count; hemogram and platelet count, automated, and manual                                                                                                                   |

| KEEPER category       | Concept ID | Concept Name                                                                                                                                                                                                                                            |
|-----------------------|------------|---------------------------------------------------------------------------------------------------------------------------------------------------------------------------------------------------------------------------------------------------------|
| Procedures            |            | differential WBC count (CBC) (Deprecated)                                                                                                                                                                                                               |
| Diagnostic Procedures | 42738270   | Blood count; hemogram and platelet count, automated, and automated partial differential WBC count (CBC) (Deprecated)                                                                                                                                    |
| Diagnostic Procedures | 42738308   | Unlisted miscellaneous pathology test (Deprecated)                                                                                                                                                                                                      |
| Diagnostic Procedures | 42739548   | Sedation with or without analgesia (conscious sedation); intravenous, intramuscular or inhalation (Deprecated)                                                                                                                                          |
| Diagnostic Procedures | 42740674   | Immunization administration younger than 8 years of age (includes percutaneous, intradermal, subcutaneous, or intramuscular injections) when the physician counsels the patient/family; first injection (single or combination vaccine/toxoid), per day |
| Diagnostic Procedures | 44782057   | DRAWING BLOOD FOR SPECIMEN (Deprecated)                                                                                                                                                                                                                 |

#### Diabetes mellitus type I

| KEEPER category     | Concept ID | Concept Name                                                                                           |
|---------------------|------------|--------------------------------------------------------------------------------------------------------|
| Disease of Interest | 201254     | Type 1 diabetes mellitus                                                                               |
| Disease of Interest | 435216     | Disorder due to type 1 diabetes mellitus                                                               |
| Symptoms            | 0          |                                                                                                        |
| Comorbidities       | 192963     | Disorder of pancreas                                                                                   |
| Comorbidities       | 201820     | Diabetes mellitus                                                                                      |
| Comorbidities       | 320128     | Essential hypertension                                                                                 |
| Comorbidities       | 375545     | Cataract                                                                                               |
| Comorbidities       | 380834     | Coma                                                                                                   |
| Comorbidities       | 433736     | Obesity                                                                                                |
| Comorbidities       | 433968     | Candidiasis                                                                                            |
| Comorbidities       | 441267     | Cystic fibrosis                                                                                        |
| Comorbidities       | 442793     | Complication due to diabetes mellitus                                                                  |
| Comorbidities       | 443238     | Diabetic - poor control                                                                                |
| Comorbidities       | 4016045    | Diabetic - good control                                                                                |
| Comorbidities       | 4034964    | Abnormal metabolic state due to diabetes mellitus                                                      |
| Comorbidities       | 4051114    | Family history of diabetes mellitus                                                                    |
| Comorbidities       | 4065354    | Neuropathic ulcer of foot due to diabetes mellitus                                                     |
| Comorbidities       | 4159742    | Diabetic foot ulcer                                                                                    |
| Comorbidities       | 4163735    | Hemochromatosis                                                                                        |
| Comorbidities       | 4170226    | Disorder of lipoprotein AND/OR lipid metabolism                                                        |
| Comorbidities       | 4209145    | Ketoacidosis                                                                                           |
| Comorbidities       | 4226354    | Gangrene due to diabetes mellitus                                                                      |
| Comorbidities       | 4299544    | Acanthosis nigricans                                                                                   |
| Comorbidities       | 40443308   | Polycystic ovary syndrome                                                                              |
| Comorbidities       | 43530690   | Foot ulcer due to type 2 diabetes mellitus                                                             |
| Comorbidities       | 45757392   | Hypertension concurrent and due to end stage renal disease on dialysis due to type 2 diabetes mellitus |

| KEEPER category       | Concept ID | Concept Name                                                                 |
|-----------------------|------------|------------------------------------------------------------------------------|
| Drugs                 | 741530     | orlistat                                                                     |
| Drugs                 | 1502809    | tolazamide                                                                   |
| Drugs                 | 1502826    | nateglinide                                                                  |
| Drugs                 | 1502905    | insulin glargine                                                             |
| Drugs                 | 1503297    | metformin                                                                    |
| Drugs                 | 1510202    | miglitol                                                                     |
| Drugs                 | 1513876    | insulin lispro protamine, human                                              |
| Drugs                 | 1515249    | troglitazone                                                                 |
| Drugs                 | 1516766    | repaglinide                                                                  |
| Drugs                 | 1516976    | insulin detemir                                                              |
| Drugs                 | 1517998    | pramlintide                                                                  |
| Drugs                 | 1525215    | pioglitazone                                                                 |
| Drugs                 | 1529331    | acarbose                                                                     |
| Drugs                 | 1530014    | acetoexamide                                                                 |
| Drugs                 | 1531601    | insulin aspart protamine, human                                              |
| Drugs                 | 1544838    | insulin glulisine, human                                                     |
| Drugs                 | 1547504    | rosiglitazone                                                                |
| Drugs                 | 1550023    | insulin lispro                                                               |
| Drugs                 | 1559684    | glyburide                                                                    |
| Drugs                 | 1560171    | glipizide                                                                    |
| Drugs                 | 1567198    | insulin aspart, human                                                        |
| Drugs                 | 1580747    | sitagliptin                                                                  |
| Drugs                 | 1583722    | exenatide                                                                    |
| Drugs                 | 1594973    | chlorpropamide                                                               |
| Drugs                 | 1597756    | glimepiride                                                                  |
| Drugs                 | 19067100   | Glucotrol XL                                                                 |
| Drugs                 | 19122121   | Insulin                                                                      |
| Drugs                 | 21600713   | INSULINS AND ANALOGUES                                                       |
| Drugs                 | 42873378   | phentermine / topiramate Extended Release Oral Capsule [Qsymia]              |
| Drugs                 | 45774489   | bupropion / naltrexone Extended Release Oral Tablet [Contrave]               |
| Diagnostic Procedures | 0          |                                                                              |
| Measurements          | 3005131    | Glucose mean value [Mass/volume] in Blood Estimated from glycated hemoglobin |
| Measurements          | 3005446    | Hemoglobin A1/Hemoglobin.total in Blood                                      |
| Measurements          | 3005673    | Hemoglobin A1c/Hemoglobin.total in Blood by HPLC                             |
| Measurements          | 3033145    | Hemoglobin A1c measurement device panel                                      |
| Measurements          | 3033819    | Glucose-6-Phosphate dehydrogenase [Presence] in Serum                        |
| Measurements          | 4018317    | Glucose measurement, quantitative                                            |
| Measurements          | 4035259    | Anti-pancreatic islet cell antibody                                          |
| Measurements          | 4041697    | Blood glucose method                                                         |



| KEEPER category       | Concept ID | Concept Name                                                                         |
|-----------------------|------------|--------------------------------------------------------------------------------------|
| Measurements          | 4144235    | Glucose measurement, blood                                                           |
| Measurements          | 4149883    | Glucose measurement, urine                                                           |
| Measurements          | 4184637    | Hemoglobin A1c measurement                                                           |
| Measurements          | 4290342    | Insulin antibody measurement                                                         |
| Measurements          | 37021662   | C peptide   Serum or Plasma   Chemistry - non-challenge                              |
| Measurements          | 37393411   | Islet cell antibody level                                                            |
| Measurements          | 40652732   | C peptide Mass Concentration Moment in time Blood, Serum or Plasma                   |
| Measurements          | 40653487   | Pancreatic islet cell Ab Presence or Threshold Moment in time Blood, Serum or Plasma |
| Measurements          | 40654476   | C peptide Moment in time Serum or Plasma                                             |
| Measurements          | 40759806   | Pancreatic islet cell IgG Ab [Titer] in Serum by Immunofluorescence                  |
| Measurements          | 40785865   | C peptide                                                                            |
| Alternative Diagnosis | 192963     | Disorder of pancreas                                                                 |
| Alternative Diagnosis | 201820     | Diabetes mellitus                                                                    |
| Alternative Diagnosis | 201826     | Type 2 diabetes mellitus                                                             |
| Alternative Diagnosis | 320128     | Essential hypertension                                                               |
| Alternative Diagnosis | 375545     | Cataract                                                                             |
| Alternative Diagnosis | 380834     | Coma                                                                                 |
| Alternative Diagnosis | 433736     | Obesity                                                                              |
| Alternative Diagnosis | 433968     | Candidiasis                                                                          |
| Alternative Diagnosis | 441267     | Cystic fibrosis                                                                      |
| Alternative Diagnosis | 442793     | Complication due to diabetes mellitus                                                |
| Alternative Diagnosis | 443238     | Diabetic - poor control                                                              |
| Alternative Diagnosis | 4016045    | Diabetic - good control                                                              |
| Alternative Diagnosis | 4034964    | Abnormal metabolic state due to diabetes mellitus                                    |
| Alternative Diagnosis | 4051114    | Family history of diabetes mellitus                                                  |
| Alternative Diagnosis | 4065354    | Neuropathic ulcer of foot due to diabetes mellitus                                   |
| Alternative Diagnosis | 4159742    | Diabetic foot ulcer                                                                  |
| Alternative           | 4163735    | Hemochromatosis                                                                      |

| KEEPER category       | Concept ID | Concept Name                                                                                            |
|-----------------------|------------|---------------------------------------------------------------------------------------------------------|
| Diagnosis             |            |                                                                                                         |
| Alternative Diagnosis | 4170226    | Disorder of lipoprotein AND/OR lipid metabolism                                                         |
| Alternative Diagnosis | 4209145    | Ketoacidosis                                                                                            |
| Alternative Diagnosis | 4226354    | Gangrene due to diabetes mellitus                                                                       |
| Alternative Diagnosis | 4299544    | Acanthosis nigricans                                                                                    |
| Alternative Diagnosis | 40443308   | Polycystic ovary syndrome                                                                               |
| Alternative Diagnosis | 43530690   | Foot ulcer due to type 2 diabetes mellitus                                                              |
| Alternative Diagnosis | 45757392   | Hypertension concurrent and due to end stage renal disease on dialysis due to type 2 diabetes mellitus  |
| Treatment Procedures  | 2746766    | Excision of Stomach, Percutaneous Endoscopic Approach, Vertical                                         |
| Treatment Procedures  | 2746768    | Excision of Stomach, Percutaneous Endoscopic Approach                                                   |
| Treatment Procedures  | 4002199    | Pancreas implantation                                                                                   |
| Treatment Procedures  | 4143852    | Laparoscopic sleeve gastrectomy                                                                         |
| Treatment Procedures  | 40756884   | Laparoscopy, surgical, gastric restrictive procedure; longitudinal gastrectomy (ie, sleeve gastrectomy) |
| Complications         | 442793     | Complication due to diabetes mellitus                                                                   |

#### Acute appendicitis

| KEEPER category     | Concept ID | Concept Name  |
|---------------------|------------|---------------|
| Disease of Interest | 440448     | Appendicitis  |
| Symptoms            | 0          |               |
| Comorbidities       | 0          |               |
| Drugs               | 997881     | clindamycin   |
| Drugs               | 1702364    | ticarcillin   |
| Drugs               | 1707164    | metronidazole |
| Drugs               | 1709170    | meropenem     |
| Drugs               | 1717327    | ampicillin    |
| Drugs               | 1717963    | ertapenem     |
| Drugs               | 1741122    | tazobactam    |
| Drugs               | 1742253    | levofloxacin  |
| Drugs               | 1746114    | piperacillin  |
| Drugs               | 1748975    | cefepime      |
| Drugs               | 1759842    | clavulanate   |

| KEEPER category       | Concept ID | Concept Name                                                                                                                                                  |
|-----------------------|------------|---------------------------------------------------------------------------------------------------------------------------------------------------------------|
| Drugs                 | 1836241    | sulbactam                                                                                                                                                     |
| Drugs                 | 45892419   | gentamicin                                                                                                                                                    |
| Diagnostic Procedures | 724944     | Radiologic examination, abdomen; 1 view                                                                                                                       |
| Diagnostic Procedures | 724945     | Radiologic examination, abdomen; 2 views                                                                                                                      |
| Diagnostic Procedures | 724988     | Radiologic examination, abdomen; 3 or more views                                                                                                              |
| Diagnostic Procedures | 725003     | Anesthesia for upper gastrointestinal endoscopic procedures, endoscope introduced proximal to duodenum; not otherwise specified                               |
| Diagnostic Procedures | 725004     | Anesthesia for upper gastrointestinal endoscopic procedures, endoscope introduced proximal to duodenum; endoscopic retrograde cholangiopancreatography (ERCP) |
| Diagnostic Procedures | 725005     | Anesthesia for lower intestinal endoscopic procedures, endoscope introduced distal to duodenum; not otherwise specified                                       |
| Diagnostic Procedures | 725007     | Anesthesia for combined upper and lower gastrointestinal endoscopic procedures, endoscope introduced both proximal to and distal to the duodenum              |
| Diagnostic Procedures | 725068     | Radiologic examination, chest; single view                                                                                                                    |
| Diagnostic Procedures | 725069     | Radiologic examination, chest; 2 views                                                                                                                        |
| Diagnostic Procedures | 2002442    | Other esophagoscopy                                                                                                                                           |
| Diagnostic Procedures | 2002685    | Other endoscopy of small intestine                                                                                                                            |
| Diagnostic Procedures | 2002946    | Open biopsy of rectum                                                                                                                                         |
| Diagnostic Procedures | 2003446    | Other laparoscopic umbilical herniorrhaphy                                                                                                                    |
| Diagnostic Procedures | 2003447    | Other open umbilical herniorrhaphy                                                                                                                            |
| Diagnostic Procedures | 2003502    | Other laparotomy                                                                                                                                              |
| Diagnostic Procedures | 2003507    | Closed [percutaneous] [needle] biopsy of intra-abdominal mass                                                                                                 |
| Diagnostic Procedures | 2003510    | Excision or destruction of lesion or tissue of abdominal wall or umbilicus                                                                                    |
| Diagnostic Procedures | 2003511    | Excision or destruction of peritoneal tissue                                                                                                                  |
| Diagnostic Procedures | 2003524    | Other lysis of peritoneal adhesions                                                                                                                           |
| Diagnostic Procedures | 2003783    | Other cystoscopy                                                                                                                                              |
| Diagnostic            | 2006932    | Diagnostic ultrasound of abdomen and retroperitoneum                                                                                                          |

| KEEPER category       | Concept ID | Concept Name                                                                                                                                                                                                                                                    |
|-----------------------|------------|-----------------------------------------------------------------------------------------------------------------------------------------------------------------------------------------------------------------------------------------------------------------|
| Procedures            |            |                                                                                                                                                                                                                                                                 |
| Diagnostic Procedures | 2006935    | Other diagnostic ultrasound                                                                                                                                                                                                                                     |
| Diagnostic Procedures | 2100901    | Anesthesia for procedures in lumbar region; diagnostic or therapeutic lumbar puncture                                                                                                                                                                           |
| Diagnostic Procedures | 2100921    | Anesthesia for procedures on upper anterior abdominal wall; not otherwise specified                                                                                                                                                                             |
| Diagnostic Procedures | 2100938    | Anesthesia for upper gastrointestinal endoscopic procedures, endoscope introduced proximal to duodenum                                                                                                                                                          |
| Diagnostic Procedures | 2108883    | Esophagogastroduodenoscopy, flexible, transoral; diagnostic, including collection of specimen(s) by brushing or washing, when performed (separate procedure)                                                                                                    |
| Diagnostic Procedures | 2108886    | Esophagogastroduodenoscopy, flexible, transoral; with transendoscopic ultrasound-guided intramural or transmural fine needle aspiration/biopsy(s), (includes endoscopic ultrasound examination limited to the esophagus, stomach or duodenum, and adjacent stru |
| Diagnostic Procedures | 2108887    | Esophagogastroduodenoscopy, flexible, transoral; with biopsy, single or multiple                                                                                                                                                                                |
| Diagnostic Procedures | 2108888    | Esophagogastroduodenoscopy, flexible, transoral; with transmural drainage of pseudocyst (includes placement of transmural drainage catheter[s]/stent[s], when performed, and endoscopic ultrasound, when performed)                                             |
| Diagnostic Procedures | 2108890    | Esophagogastroduodenoscopy, flexible, transoral; with transendoscopic ultrasound-guided intramural or transmural fine needle aspiration/biopsy(s) (includes endoscopic ultrasound examination of the esophagus, stomach, and either the duodenum or a surgicall |
| Diagnostic Procedures | 2108904    | Esophagogastroduodenoscopy, flexible, transoral; with endoscopic ultrasound examination, including the esophagus, stomach, and either the duodenum or a surgically altered stomach where the jejunum is examined distal to the anastomosis                      |
| Diagnostic Procedures | 2109089    | Small intestinal endoscopy, enteroscopy beyond second portion of duodenum, not including ileum; with biopsy, single or multiple                                                                                                                                 |
| Diagnostic Procedures | 2109103    | Ileoscopy, through stoma; with biopsy, single or multiple                                                                                                                                                                                                       |
| Diagnostic Procedures | 2109180    | Sigmoidoscopy, flexible; diagnostic, including collection of specimen(s) by brushing or washing, when performed (separate procedure)                                                                                                                            |
| Diagnostic Procedures | 2109181    | Sigmoidoscopy, flexible; with biopsy, single or multiple                                                                                                                                                                                                        |
| Diagnostic Procedures | 2109194    | Colonoscopy, flexible; diagnostic, including collection of specimen(s) by brushing or washing, when performed (separate procedure)                                                                                                                              |
| Diagnostic Procedures | 2109201    | Colonoscopy, flexible; with removal of tumor(s), polyp(s), or other lesion(s) by snare technique                                                                                                                                                                |
| Diagnostic Procedures | 2109310    | Biopsy of liver, needle; when done for indicated purpose at time of other major procedure (List separately in addition to code for primary procedure)                                                                                                           |
| Diagnostic Procedures | 2109465    | Exchange of previously placed abscess or cyst drainage catheter under radiological guidance (separate procedure)                                                                                                                                                |

| KEEPER category       | Concept ID | Concept Name                                                                                                                                                                                                                               |
|-----------------------|------------|--------------------------------------------------------------------------------------------------------------------------------------------------------------------------------------------------------------------------------------------|
| Diagnostic Procedures | 2109567    | Renal biopsy; by surgical exposure of kidney                                                                                                                                                                                               |
| Diagnostic Procedures | 2109586    | Renal allotransplantation, implantation of graft; without recipient nephrectomy                                                                                                                                                            |
| Diagnostic Procedures | 2109766    | Cystourethroscopy (separate procedure)                                                                                                                                                                                                     |
| Diagnostic Procedures | 2211426    | Magnetic resonance (eg, proton) imaging, pelvis; without contrast material(s)                                                                                                                                                              |
| Diagnostic Procedures | 2211427    | Magnetic resonance (eg, proton) imaging, pelvis; with contrast material(s)                                                                                                                                                                 |
| Diagnostic Procedures | 2211428    | Magnetic resonance (eg, proton) imaging, pelvis; without contrast material(s), followed by contrast material(s) and further sequences                                                                                                      |
| Diagnostic Procedures | 2211493    | Radiologic examination; toe(s), minimum of 2 views                                                                                                                                                                                         |
| Diagnostic Procedures | 2211514    | Magnetic resonance (eg, proton) imaging, abdomen; without contrast material(s)                                                                                                                                                             |
| Diagnostic Procedures | 2211515    | Magnetic resonance (eg, proton) imaging, abdomen; with contrast material(s)                                                                                                                                                                |
| Diagnostic Procedures | 2211516    | Magnetic resonance (eg, proton) imaging, abdomen; without contrast material(s), followed by with contrast material(s) and further sequences                                                                                                |
| Diagnostic Procedures | 2211639    | Percutaneous placement of IVC filter, radiological supervision and interpretation                                                                                                                                                          |
| Diagnostic Procedures | 2211740    | Ultrasound, abdominal, real time with image documentation; complete                                                                                                                                                                        |
| Diagnostic Procedures | 2211741    | Ultrasound, abdominal, real time with image documentation; limited (eg, single organ, quadrant, follow-up)                                                                                                                                 |
| Diagnostic Procedures | 2211742    | Ultrasound, retroperitoneal (eg, renal, aorta, nodes), real time with image documentation; complete                                                                                                                                        |
| Diagnostic Procedures | 2211743    | Ultrasound, retroperitoneal (eg, renal, aorta, nodes), real time with image documentation; limited                                                                                                                                         |
| Diagnostic Procedures | 2211744    | Ultrasound, transplanted kidney, real time and duplex Doppler with image documentation                                                                                                                                                     |
| Diagnostic Procedures | 2211768    | Ultrasound, pelvic (nonobstetric), real time with image documentation; limited or follow-up (eg, for follicles)                                                                                                                            |
| Diagnostic Procedures | 2211769    | Ultrasound, scrotum and contents                                                                                                                                                                                                           |
| Diagnostic Procedures | 2211950    | Hepatobiliary ductal system imaging, including gallbladder, with or without pharmacologic intervention, with or without quantitative measurement of gallbladder function                                                                   |
| Diagnostic Procedures | 2313699    | Binocular microscopy (separate diagnostic procedure)                                                                                                                                                                                       |
| Diagnostic Procedures | 2313828    | External electrocardiographic recording up to 48 hours by continuous rhythm recording and storage; includes recording, scanning analysis with report, review and interpretation by a physician or other qualified health care professional |
| Diagnostic            | 2313992    | Duplex scan of arterial inflow and venous outflow of abdominal, pelvic,                                                                                                                                                                    |

| KEEPER category       | Concept ID | Concept Name                                                                                                                          |
|-----------------------|------------|---------------------------------------------------------------------------------------------------------------------------------------|
| Procedures            |            | scrotal contents and/or retroperitoneal organs; complete study                                                                        |
| Diagnostic Procedures | 2313993    | Duplex scan of arterial inflow and venous outflow of abdominal, pelvic, scrotal contents and/or retroperitoneal organs; limited study |
| Diagnostic Procedures | 2722221    | Hysteroscopy, diagnostic (separate procedure). (Deprecated)                                                                           |
| Diagnostic Procedures | 2722222    | Hysteroscopy, surgical; with sampling (biopsy) of endometrium and/or polypectomy, with or without D & C. (Deprecated)                 |
| Diagnostic Procedures | 2746590    | Release Small Intestine, Open Approach                                                                                                |
| Diagnostic Procedures | 2746607    | Release Ileum, Percutaneous Endoscopic Approach                                                                                       |
| Diagnostic Procedures | 2746773    | Excision of Stomach, Via Natural or Artificial Opening Endoscopic, Diagnostic                                                         |
| Diagnostic Procedures | 2746810    | Release Peritoneum, Open Approach                                                                                                     |
| Diagnostic Procedures | 2747541    | Excision of Lesser Omentum, Percutaneous Endoscopic Approach, Diagnostic (Deprecated)                                                 |
| Diagnostic Procedures | 2747549    | Excision of Peritoneum, Open Approach, Diagnostic                                                                                     |
| Diagnostic Procedures | 2773682    | Excision of Right Kidney, Percutaneous Approach, Diagnostic                                                                           |
| Diagnostic Procedures | 2773692    | Excision of Left Kidney, Percutaneous Approach, Diagnostic                                                                            |
| Diagnostic Procedures | 2776180    | Bypass Bilateral Ureters to Ileocutaneous, Open Approach                                                                              |
| Diagnostic Procedures | 2779576    | Drainage of Peritoneal Cavity, Percutaneous Endoscopic Approach, Diagnostic                                                           |
| Diagnostic Procedures | 2793091    | Magnetic Resonance Imaging (MRI) of Abdomen using Other Contrast                                                                      |
| Diagnostic Procedures | 2793092    | Magnetic Resonance Imaging (MRI) of Abdomen                                                                                           |
| Diagnostic Procedures | 4045438    | Rigid proctosigmoidoscopy                                                                                                             |
| Diagnostic Procedures | 4052532    | Hysteroscopy                                                                                                                          |
| Diagnostic Procedures | 4085764    | Percutaneous aspiration of liver                                                                                                      |
| Diagnostic Procedures | 4123999    | Percutaneous needle biopsy of liver                                                                                                   |
| Diagnostic Procedures | 4167416    | Renal lithotripsy                                                                                                                     |
| Diagnostic Procedures | 4175226    | Screening for malignant neoplasm of colon                                                                                             |
| Diagnostic Procedures | 4178367    | Radiographic imaging procedure                                                                                                        |

| KEEPER category       | Concept ID | Concept Name                                                                 |
|-----------------------|------------|------------------------------------------------------------------------------|
| Diagnostic Procedures | 4207654    | Diagnostic ultrasound of gravid uterus                                       |
| Diagnostic Procedures | 4218549    | Small intestinal endoscopy with biopsy                                       |
| Diagnostic Procedures | 4220239    | Open biopsy of liver                                                         |
| Diagnostic Procedures | 4230660    | Anoscopy                                                                     |
| Diagnostic Procedures | 4231419    | Abdominal paracentesis                                                       |
| Diagnostic Procedures | 4241100    | Reduction mammoplasty                                                        |
| Diagnostic Procedures | 4249160    | Open biopsy of large intestine                                               |
| Diagnostic Procedures | 4249893    | Colonoscopy                                                                  |
| Diagnostic Procedures | 4251314    | Laparoscopy                                                                  |
| Diagnostic Procedures | 4253523    | Exploratory laparotomy                                                       |
| Diagnostic Procedures | 42742552   | Hepatobiliary system imaging, including gallbladder when present             |
| Diagnostic Procedures | 43527935   | Esophagogastroduodenoscopy, flexible, transoral; with optical endomicroscopy |
| Diagnostic Procedures | 46257516   | Colonoscopy, flexible; with endoscopic mucosal resection                     |
| Diagnostic Procedures | 46273536   | Laparoscopic biopsy of ovary                                                 |
| Measurements          | 3000905    | Leukocytes [# /volume] in Blood by Automated count                           |
| Measurements          | 3013650    | Neutrophils [# /volume] in Blood by Automated count                          |
| Measurements          | 3017732    | Neutrophils [# /volume] in Blood                                             |
| Measurements          | 3018010    | Neutrophils/100 leukocytes in Blood                                          |
| Alternative Diagnosis | 201618     | Disorder of intestine                                                        |
| Alternative Diagnosis | 444089     | Disorder of abdomen                                                          |
| Alternative Diagnosis | 4171379    | Disorder of the genitourinary system                                         |
| Alternative Diagnosis | 43531054   | Disorder of pelvis                                                           |
| Treatment Procedures  | 2000219    | Other peripheral nerve or ganglion decompression or lysis of adhesions       |
| Treatment Procedures  | 2000811    | Laparoscopic cecectomy                                                       |
| Treatment             | 2001423    | Excision of lesion or tissue of diaphragm                                    |

| KEEPER category      | Concept ID | Concept Name                                                               |
|----------------------|------------|----------------------------------------------------------------------------|
| Procedures           |            |                                                                            |
| Treatment Procedures | 2002531    | Other gastrostomy                                                          |
| Treatment Procedures | 2002724    | Local excision of lesion or tissue of small intestine, except duodenum     |
| Treatment Procedures | 2002747    | Other partial resection of small intestine                                 |
| Treatment Procedures | 2002751    | Open and other cecectomy                                                   |
| Treatment Procedures | 2002762    | Open and other right hemicolectomy                                         |
| Treatment Procedures | 2002785    | Other small-to-large intestinal anastomosis                                |
| Treatment Procedures | 2002869    | Suture of laceration of large intestine                                    |
| Treatment Procedures | 2002909    | Other appendectomy                                                         |
| Treatment Procedures | 2002911    | Laparoscopic incidental appendectomy                                       |
| Treatment Procedures | 2002922    | Other incidental appendectomy                                              |
| Treatment Procedures | 2002964    | Local excision of rectal lesion or tissue                                  |
| Treatment Procedures | 2003510    | Excision or destruction of lesion or tissue of abdominal wall or umbilicus |
| Treatment Procedures | 2003511    | Excision or destruction of peritoneal tissue                               |
| Treatment Procedures | 2003565    | Other operations of abdominal region                                       |
| Treatment Procedures | 2003626    | Other kidney transplantation                                               |
| Treatment Procedures | 2003898    | Other lysis of perirenal or periureteral adhesions                         |
| Treatment Procedures | 2004230    | Other local excision or destruction of ovary                               |
| Treatment Procedures | 2004269    | Other reimplantation of ovary                                              |
| Treatment Procedures | 2004449    | Other excision or destruction of lesion of uterus                          |
| Treatment Procedures | 2004491    | Other dilation and curettage                                               |
| Treatment Procedures | 2004503    | Other excision or destruction of uterus and supporting structures          |
| Treatment Procedures | 2004643    | Other operations on cul-de-sac                                             |



| KEEPER category      | Concept ID | Concept Name                                                                                                                                                                                                        |
|----------------------|------------|---------------------------------------------------------------------------------------------------------------------------------------------------------------------------------------------------------------------|
| Treatment Procedures | 2004788    | Removal of extratubal ectopic pregnancy                                                                                                                                                                             |
| Treatment Procedures | 2008268    | Injection of other anti-infective                                                                                                                                                                                   |
| Treatment Procedures | 2100941    | Anesthesia for hernia repairs in upper abdomen; lumbar and ventral (incisional) hernias and/or wound dehiscence                                                                                                     |
| Treatment Procedures | 2100992    | Anesthesia for hernia repairs in lower abdomen; not otherwise specified                                                                                                                                             |
| Treatment Procedures | 2101056    | Anesthesia for; anorectal procedure                                                                                                                                                                                 |
| Treatment Procedures | 2101807    | Anesthesia for cesarean delivery only                                                                                                                                                                               |
| Treatment Procedures | 2101813    | Neuraxial labor analgesia/anesthesia for planned vaginal delivery (this includes any repeat subarachnoid needle placement and drug injection and/or any necessary replacement of an epidural catheter during labor) |
| Treatment Procedures | 2101877    | Incision and drainage of abscess (eg, carbuncle, suppurative hidradenitis, cutaneous or subcutaneous abscess, cyst, furuncle, or paronychia); simple or single                                                      |
| Treatment Procedures | 2101888    | Puncture aspiration of abscess, hematoma, bulla, or cyst                                                                                                                                                            |
| Treatment Procedures | 2108476    | Laparoscopy, surgical; with retroperitoneal lymph node sampling (biopsy), single or multiple                                                                                                                        |
| Treatment Procedures | 2109017    | Enterolysis (freeing of intestinal adhesion) (separate procedure)                                                                                                                                                   |
| Treatment Procedures | 2109024    | Correction of malrotation by lysis of duodenal bands and/or reduction of midgut volvulus (eg, Ladd procedure)                                                                                                       |
| Treatment Procedures | 2109028    | Enterectomy, resection of small intestine; single resection and anastomosis                                                                                                                                         |
| Treatment Procedures | 2109040    | Mobilization (take-down) of splenic flexure performed in conjunction with partial colectomy (List separately in addition to primary procedure)                                                                      |
| Treatment Procedures | 2109041    | Colectomy, partial; with anastomosis                                                                                                                                                                                |
| Treatment Procedures | 2109056    | Colectomy, partial, with removal of terminal ileum with ileocolostomy                                                                                                                                               |
| Treatment Procedures | 2109063    | Laparoscopy, surgical; enterectomy, resection of small intestine, single resection and anastomosis                                                                                                                  |
| Treatment Procedures | 2109066    | Laparoscopy, surgical; colectomy, partial, with removal of terminal ileum with ileocolostomy                                                                                                                        |
| Treatment Procedures | 2109116    | Suture of small intestine (enterorrhaphy) for perforated ulcer, diverticulum, wound, injury or rupture; single perforation                                                                                          |
| Treatment Procedures | 2109139    | Incision and drainage of appendiceal abscess, open                                                                                                                                                                  |
| Treatment Procedures | 2109140    | Incision and drainage of appendiceal abscess; percutaneous                                                                                                                                                          |
| Treatment Procedures | 2109141    | Appendectomy                                                                                                                                                                                                        |

| KEEPER category      | Concept ID | Concept Name                                                                                                                                                                                                |
|----------------------|------------|-------------------------------------------------------------------------------------------------------------------------------------------------------------------------------------------------------------|
| Treatment Procedures | 2109142    | Appendectomy; when done for indicated purpose at time of other major procedure (not as separate procedure) (List separately in addition to code for primary procedure)                                      |
| Treatment Procedures | 2109143    | Appendectomy; for ruptured appendix with abscess or generalized peritonitis                                                                                                                                 |
| Treatment Procedures | 2109144    | Laparoscopy, surgical, appendectomy                                                                                                                                                                         |
| Treatment Procedures | 2109145    | Unlisted laparoscopy procedure, appendix                                                                                                                                                                    |
| Treatment Procedures | 2109146    | Transrectal drainage of pelvic abscess                                                                                                                                                                      |
| Treatment Procedures | 2109312    | Hepatotomy; for percutaneous drainage of abscess or cyst, 1 or 2 stages                                                                                                                                     |
| Treatment Procedures | 2109366    | Laparoscopy, surgical; cholecystoenterostomy                                                                                                                                                                |
| Treatment Procedures | 2109432    | Drainage of peritoneal abscess or localized peritonitis, exclusive of appendiceal abscess; percutaneous                                                                                                     |
| Treatment Procedures | 2109435    | Drainage of retroperitoneal abscess, open                                                                                                                                                                   |
| Treatment Procedures | 2109444    | Excision or destruction, open, intra-abdominal tumors, cysts or endometriomas, 1 or more peritoneal, mesenteric, or retroperitoneal primary or secondary tumors; largest tumor 5 cm diameter or less        |
| Treatment Procedures | 2109453    | Laparoscopy, surgical; with aspiration of cavity or cyst (eg, ovarian cyst) (single or multiple)                                                                                                            |
| Treatment Procedures | 2109669    | Continent diversion, including intestine anastomosis using any segment of small and/or large intestine (Kock pouch or Camey enterocystoplasty)                                                              |
| Treatment Procedures | 2109701    | Cystostomy, cystotomy with drainage                                                                                                                                                                         |
| Treatment Procedures | 2109748    | Cystoplasty or cystourethroplasty, plastic operation on bladder and/or vesical neck (anterior Y-plasty, vesical fundus resection), any procedure, with or without wedge resection of posterior vesical neck |
| Treatment Procedures | 2110001    | Excision of hydrocele; unilateral                                                                                                                                                                           |
| Treatment Procedures | 2110239    | Laparoscopy, surgical; with lysis of adhesions (salpingolysis, ovariolysis) (separate procedure)                                                                                                            |
| Treatment Procedures | 2110257    | Drainage of ovarian abscess; abdominal approach                                                                                                                                                             |
| Treatment Procedures | 2110258    | Drainage of pelvic abscess, transvaginal or transrectal approach, percutaneous (eg, ovarian, pericolic)                                                                                                     |
| Treatment Procedures | 2110308    | Vaginal delivery only (with or without episiotomy and/or forceps)                                                                                                                                           |
| Treatment Procedures | 2110316    | Cesarean delivery only                                                                                                                                                                                      |
| Treatment Procedures | 2110330    | Induced abortion, by dilation and evacuation                                                                                                                                                                |
| Treatment            | 2110394    | Laparoscopy, surgical, with adrenalectomy, partial or complete, or                                                                                                                                          |

| KEEPER category      | Concept ID | Concept Name                                                                                                                                   |
|----------------------|------------|------------------------------------------------------------------------------------------------------------------------------------------------|
| Procedures           |            | exploration of adrenal gland with or without biopsy, transabdominal, lumbar or dorsal                                                          |
| Treatment Procedures | 2722201    | Laparoscopy, surgical; with fulguration or excision of lesions of the ovary, pelvic viscera, or peritoneal surface by any method. (Deprecated) |
| Treatment Procedures | 2722202    | Laparoscopy, surgical; with lysis of adhesions. (Deprecated)                                                                                   |
| Treatment Procedures | 2722210    | Laparoscopy, surgical; appendectomy (Deprecated)                                                                                               |
| Treatment Procedures | 2746508    | Drainage of Peritoneum with Drainage Device, Percutaneous Endoscopic Approach                                                                  |
| Treatment Procedures | 2746510    | Drainage of Peritoneum, Percutaneous Endoscopic Approach                                                                                       |
| Treatment Procedures | 2747010    | Excision of Ileum, Open Approach                                                                                                               |
| Treatment Procedures | 2747064    | Excision of Cecum, Percutaneous Endoscopic Approach                                                                                            |
| Treatment Procedures | 2747277    | Excision of Transverse Colon, Open Approach                                                                                                    |
| Treatment Procedures | 2750141    | Supplement Cecum with Autologous Tissue Substitute, Percutaneous Endoscopic Approach                                                           |
| Treatment Procedures | 2752899    | Reposition Cecum, Percutaneous Endoscopic Approach                                                                                             |
| Treatment Procedures | 2753378    | Resection of Cecum, Open Approach                                                                                                              |
| Treatment Procedures | 2753382    | Resection of Appendix, Open Approach                                                                                                           |
| Treatment Procedures | 2753383    | Resection of Appendix, Percutaneous Endoscopic Approach                                                                                        |
| Treatment Procedures | 2753386    | Resection of Ascending Colon, Open Approach                                                                                                    |
| Treatment Procedures | 2755284    | Drainage of Pelvic Region Subcutaneous Tissue and Fascia, Percutaneous Approach                                                                |
| Treatment Procedures | 2776677    | Dilation of Right Kidney Pelvis with Intraluminal Device, Open Approach                                                                        |
| Treatment Procedures | 2776907    | Dilation of Bilateral Ureters with Intraluminal Device, Open Approach                                                                          |
| Treatment Procedures | 2777024    | Supplement Bladder with Autologous Tissue Substitute, Open Approach                                                                            |
| Treatment Procedures | 2777438    | Drainage of Bladder with Drainage Device, Percutaneous Approach                                                                                |
| Treatment Procedures | 2779572    | Drainage of Peritoneal Cavity with Drainage Device, Percutaneous Approach                                                                      |
| Treatment Procedures | 2779574    | Drainage of Peritoneal Cavity, Percutaneous Approach                                                                                           |
| Treatment Procedures | 2779577    | Drainage of Peritoneal Cavity, Percutaneous Endoscopic Approach                                                                                |

| KEEPER category      | Concept ID | Concept Name                                                |
|----------------------|------------|-------------------------------------------------------------|
| Treatment Procedures | 2779777    | Drainage of Pelvic Cavity, Percutaneous Approach            |
| Treatment Procedures | 2779780    | Drainage of Pelvic Cavity, Percutaneous Endoscopic Approach |
| Treatment Procedures | 4013040    | Anastomosis of large intestine to large intestine           |
| Treatment Procedures | 4018156    | Drainage of appendix abscess                                |
| Treatment Procedures | 4018300    | Total splenectomy                                           |
| Treatment Procedures | 4127886    | Hysterectomy                                                |
| Treatment Procedures | 4135441    | Closure of colostomy                                        |
| Treatment Procedures | 4148762    | Printen and Mason operation, high gastric bypass            |
| Treatment Procedures | 4150970    | Medical induction of labor                                  |
| Treatment Procedures | 4162987    | Colostomy                                                   |
| Treatment Procedures | 4173452    | Fistulization of appendix                                   |
| Treatment Procedures | 4179797    | Laparoscopic-assisted right colectomy                       |
| Treatment Procedures | 4196081    | Anastomosis of small intestine to small intestine           |
| Treatment Procedures | 4196678    | Hernia repair                                               |
| Treatment Procedures | 4198190    | Appendectomy                                                |
| Treatment Procedures | 4216096    | Homotransplant of pancreas                                  |
| Treatment Procedures | 4220986    | Incidental appendectomy                                     |
| Treatment Procedures | 4231419    | Abdominal paracentesis                                      |
| Treatment Procedures | 4234536    | Transurethral prostatectomy                                 |
| Treatment Procedures | 4242997    | Cholecystectomy                                             |
| Treatment Procedures | 4243665    | Dilation of rectum                                          |
| Treatment Procedures | 4243973    | Laparoscopic appendectomy                                   |
| Treatment            | 4249749    | Suture of bladder                                           |

| KEEPER category      | Concept ID | Concept Name                                                                                          |
|----------------------|------------|-------------------------------------------------------------------------------------------------------|
| Procedures           |            |                                                                                                       |
| Treatment Procedures | 4265608    | Detorsion of ovary                                                                                    |
| Treatment Procedures | 4298948    | Ligation of fallopian tube                                                                            |
| Treatment Procedures | 4306298    | Oophorectomy                                                                                          |
| Treatment Procedures | 37312440   | Lower uterine segment cesarean section                                                                |
| Treatment Procedures | 40490893   | Laparoscopic lysis of adhesions of ovary and fallopian tube                                           |
| Treatment Procedures | 40493226   | Excision of fallopian tube and surgical removal of ectopic pregnancy                                  |
| Treatment Procedures | 42739084   | Laparoscopy, surgical; enterolysis (freeing of intestinal adhesion) (separate procedure) (Deprecated) |
| Treatment Procedures | 46270663   | Laparoscopic lysis of adhesion of peritoneum                                                          |
| Complications        | 200219     | Abdominal pain                                                                                        |
| Complications        | 444089     | Disorder of abdomen                                                                                   |
| Complications        | 4171379    | Disorder of the genitourinary system                                                                  |
| Complications        | 43531054   | Disorder of pelvis                                                                                    |

#### End-stage renal disease

| KEEPER category     | Concept ID | Concept Name                                 |
|---------------------|------------|----------------------------------------------|
| Disease of Interest | 193782     | End-stage renal disease                      |
| Disease of Interest | 443611     | Chronic kidney disease stage 5               |
| Disease of Interest | 46271022   | Chronic kidney disease                       |
| Symptoms            | 0          |                                              |
| Comorbidities       | 200528     | Ascites                                      |
| Comorbidities       | 257628     | Systemic lupus erythematosus                 |
| Comorbidities       | 316139     | Heart failure                                |
| Comorbidities       | 434610     | Hyperkalemia                                 |
| Comorbidities       | 437233     | Multiple myeloma                             |
| Comorbidities       | 35623051   | Autosomal dominant polycystic kidney disease |
| Drugs               | 932745     | bumetanide                                   |
| Drugs               | 936748     | aprepitant                                   |
| Drugs               | 950637     | tacrolimus                                   |
| Drugs               | 956874     | furosemide                                   |
| Drugs               | 1154343    | albuterol                                    |
| Drugs               | 1301125    | epoetin alfa                                 |

| KEEPER category       | Concept ID | Concept Name                                                                                                                                    |
|-----------------------|------------|-------------------------------------------------------------------------------------------------------------------------------------------------|
| Drugs                 | 1304643    | darbepoetin alfa                                                                                                                                |
| Drugs                 | 1344143    | albumin human, USP                                                                                                                              |
| Drugs                 | 1557272    | alendronate                                                                                                                                     |
| Drugs                 | 19014878   | azathioprine                                                                                                                                    |
| Drugs                 | 19035631   | calcitriol                                                                                                                                      |
| Drugs                 | 19037038   | calcium gluconate                                                                                                                               |
| Drugs                 | 19038440   | basiliximab                                                                                                                                     |
| Drugs                 | 19045045   | ergocalciferol                                                                                                                                  |
| Diagnostic Procedures | 2211744    | Ultrasound, transplanted kidney, real time and duplex Doppler with image documentation                                                          |
| Diagnostic Procedures | 4304092    | CT of abdomen and pelvis                                                                                                                        |
| Diagnostic Procedures | 42737578   | Ultrasound, transplanted kidney, B-scan and/or real time with image documentation, with or without duplex Doppler study (Deprecated)            |
| Measurements          | 440529     | Abnormal findings on diagnostic imaging of urinary organs                                                                                       |
| Measurements          | 3000034    | Microalbumin [Mass/volume] in Urine                                                                                                             |
| Measurements          | 3001802    | Microalbumin/Creatinine [Mass Ratio] in Urine                                                                                                   |
| Measurements          | 3004239    | Creatinine [Mass/time] in 24 hour Urine                                                                                                         |
| Measurements          | 3004295    | Urea nitrogen [Mass/volume] in Blood                                                                                                            |
| Measurements          | 3011965    | Urea nitrogen [Mass/volume] in Urine                                                                                                            |
| Measurements          | 3013682    | Urea nitrogen [Mass/volume] in Serum or Plasma                                                                                                  |
| Measurements          | 3016647    | Creatinine [Mass/volume] in Peritoneal fluid                                                                                                    |
| Measurements          | 3016723    | Creatinine [Mass/volume] in Serum or Plasma                                                                                                     |
| Measurements          | 3017250    | Creatinine [Mass/volume] in Urine                                                                                                               |
| Measurements          | 3018311    | Urea nitrogen/Creatinine [Mass Ratio] in Serum or Plasma                                                                                        |
| Measurements          | 3020149    | 25-hydroxyvitamin D3 [Mass/volume] in Serum or Plasma                                                                                           |
| Measurements          | 3028942    | 11-Dehydro thromboxane beta 2/Creatinine [Mass Ratio] in Urine                                                                                  |
| Measurements          | 3034734    | Urea [Mass/volume] in Urine                                                                                                                     |
| Measurements          | 3049187    | Glomerular filtration rate/1.73 sq M.predicted among non-blacks [Volume Rate/Area] in Serum, Plasma or Blood by Creatinine-based formula (MDRD) |
| Measurements          | 3051825    | Creatinine [Mass/volume] in Blood                                                                                                               |
| Measurements          | 3053283    | Glomerular filtration rate/1.73 sq M.predicted among blacks [Volume Rate/Area] in Serum, Plasma or Blood by Creatinine-based formula (MDRD)     |
| Measurements          | 4168689    | Abnormal findings on microbiological examination of urine                                                                                       |
| Measurements          | 40765040   | 25-Hydroxyvitamin D3+25-Hydroxyvitamin D2 [Mass/volume] in Serum or Plasma                                                                      |
| Measurements          | 46236952   | Glomerular filtration rate/1.73 sq M.predicted [Volume Rate/Area] in Serum, Plasma or Blood by Creatinine-based formula (MDRD)                  |
| Alternative Diagnosis | 197320     | Acute renal failure syndrome                                                                                                                    |
| Alternative           | 761083     | Acute injury of kidney                                                                                                                          |

| KEEPER category       | Concept ID | Concept Name                                                                                                                         |
|-----------------------|------------|--------------------------------------------------------------------------------------------------------------------------------------|
| Diagnosis             |            |                                                                                                                                      |
| Alternative Diagnosis | 4220631    | Injury of kidney                                                                                                                     |
| Alternative Diagnosis | 35623051   | Autosomal dominant polycystic kidney disease                                                                                         |
| Alternative Diagnosis | 46271022   | Chronic kidney disease                                                                                                               |
| Treatment Procedures  | 4120120    | Hemodialysis                                                                                                                         |
| Treatment Procedures  | 42737578   | Ultrasound, transplanted kidney, B-scan and/or real time with image documentation, with or without duplex Doppler study (Deprecated) |
| Treatment Procedures  | 45888790   | Renal Transplantation Procedures                                                                                                     |
| Complications         | 80502      | Osteoporosis                                                                                                                         |
| Complications         | 133729     | Hyperparathyroidism                                                                                                                  |
| Complications         | 140673     | Hypothyroidism                                                                                                                       |
| Complications         | 432867     | Hyperlipidemia                                                                                                                       |
| Complications         | 434610     | Hyperkalemia                                                                                                                         |
| Complications         | 436070     | Vitamin D deficiency                                                                                                                 |
| Complications         | 439777     | Anemia                                                                                                                               |
| Complications         | 42539502   | Transplanted kidney present                                                                                                          |

#### Chronic obstructive pulmonary disorder (COPD)

| KEEPER category       | Concept ID | Concept Name                                                                                                                      |
|-----------------------|------------|-----------------------------------------------------------------------------------------------------------------------------------|
| Disease of Interest   | 255573     | Chronic obstructive lung disease                                                                                                  |
| Symptoms              | 0          |                                                                                                                                   |
| Comorbidities         | 77670      | Chest pain                                                                                                                        |
| Comorbidities         | 254761     | Cough                                                                                                                             |
| Comorbidities         | 312437     | Dyspnea                                                                                                                           |
| Comorbidities         | 314754     | Wheezing                                                                                                                          |
| Comorbidities         | 316139     | Heart failure                                                                                                                     |
| Comorbidities         | 320136     | Disorder of respiratory system                                                                                                    |
| Comorbidities         | 4185932    | Ischemic heart disease                                                                                                            |
| Comorbidities         | 4268843    | Tobacco use and exposure - finding                                                                                                |
| Drugs                 | 21605007   | RESPIRATORY SYSTEM                                                                                                                |
| Diagnostic Procedures | 2106588    | Bronchoscopy, rigid or flexible, including fluoroscopic guidance, when performed; with transbronchial lung biopsy(s), single lobe |
| Diagnostic Procedures | 4040549    | Procedure on lung                                                                                                                 |
| Diagnostic Procedures | 4223086    | Anesthesia for thoracotomy procedure involving lungs                                                                              |
| Diagnostic Procedures | 4303062    | Biopsy of lung                                                                                                                    |
| Diagnostic            | 40480054   | Imaging of lung                                                                                                                   |

| KEEPER category       | Concept ID | Concept Name                                |
|-----------------------|------------|---------------------------------------------|
| Procedures            |            |                                             |
| Measurements          | 45875979   | Pulmonary ventilator management             |
| Alternative Diagnosis | 257907     | Disorder of lung                            |
| Alternative Diagnosis | 260131     | Disorder of bronchus                        |
| Alternative Diagnosis | 316139     | Heart failure                               |
| Alternative Diagnosis | 317009     | Asthma                                      |
| Alternative Diagnosis | 4063381    | Chronic disease of respiratory system       |
| Treatment Procedures  | 4119403    | Excision of lung or bronchus                |
| Treatment Procedures  | 4141937    | Lung and/or mediastinum operations          |
| Treatment Procedures  | 45887822   | Surgical Procedures on the Lungs and Pleura |
| Complications         | 256449     | Bronchiectasis                              |
| Complications         | 261325     | Pulmonary emphysema                         |
| Complications         | 261880     | Atelectasis                                 |

### Supplementary Note 3: LLM response parser

This code was used to transform the free-text response of the large language models (LLMs) into three categories: "yes", "no", or "I don't know".

```

response <- trimws(gsub("^.*\nSummary:", "", response))
if (grepl("500 Internal Server Error", response, ignore.case = TRUE)) {
  result <- NA
} else if (grepl("\"yes\" or \"no\"", response, ignore.case = TRUE)) {
  result <- "I don't know"
} else if (grepl("\"yes\\.?\"", response, ignore.case = TRUE)) {
  result <- "yes"
} else if (grepl("\"no\\.?\"", response, ignore.case = TRUE)) {
  result <- "no"
} else if (grepl("It is not the most probable scenario", response, ignore.case =
TRUE)) {
  result <- "no"
} else if (grepl("(^|2[\\. ]+|\\()no([^-z]|$)", response, ignore.case = TRUE)) {
  result <- "no"
} else if (grepl("\"don't know\\.?\"", response, ignore.case = TRUE)) {
  result <- "I don't know"
} else if (grepl("\"unclear\\.?\"", response, ignore.case = TRUE)) {
  result <- "I don't know"
} else if (grepl("\"uncertain\\.?\"", response, ignore.case = TRUE)) {
  result <- "I don't know"
} else if (grepl("don't know", response, ignore.case = TRUE)) {

```



```

    result <- "I don't know"
  } else if (grepl("\\maybe\\", response, ignore.case = TRUE)) {
    result <- "I don't know"
  } else if (grepl("([a-z]|^)^yes([a-z]|$)", response, ignore.case = TRUE)) {
    result <- "yes"
  } else if (grepl("([a-z]|^)^no([a-z]|$)", response, ignore.case = TRUE)) {
    result <- "no"
  } else if (grepl("the evidence supports the diagnosis of", response, ignore.case =
TRUE)) {
    result <- "yes"
  } else if (grepl("finding is inconclusive", response, ignore.case = TRUE)) {
    result <- "I don't know"
  } else if (grepl("further information is needed", response, ignore.case = TRUE)) {
    result <- "I don't know"
  } else if (grepl("I cannot[a-z ]+determine ", response, ignore.case = TRUE)) {
    result <- "I don't know"
  } else if (grepl("insufficient information", response, ignore.case = TRUE)) {
    result <- "I don't know"
  } else if (grepl("insufficient evidence", response, ignore.case = TRUE)) {
    result <- "I don't know"
  } else if (grepl("unclear", response, ignore.case = TRUE)) {
    result <- "I don't know"
  } else if (grepl("inconclusive", response, ignore.case = TRUE)) {
    result <- "I don't know"
  } else if (grepl("uncertain", response, ignore.case = TRUE)) {
    result <- "I don't know"
  } else if (grepl("definitive", response, ignore.case = TRUE)) {
    result <- "I don't know"
  } else if (grepl("possible", response, ignore.case = TRUE)) {
    result <- "I don't know"
  } else if (grepl("[a-z]likely ", response, ignore.case = TRUE)) {
    result <- "yes"
  } else if (grepl("[a-z]probable ", response, ignore.case = TRUE)) {
    result <- "yes"
  } else if (noMatchIsDontKnow){
    result <- "I don't know"
  } else {
    result <- NA
    warning(sprintf("Unable to parse '%s'", responseFileName))
  }
}

```

## Supplementary Note 4: System prompt templates

### Yes/no

Act as a medical doctor reviewing a patient's healthcare data captured during routine clinical care, such as electronic health records and insurance claims. Determine whether the patient had <disease>.

Use the following format:

Summary: (Only "yes" or "no")

#### + discuss evidence

Act as a medical doctor reviewing a patient's healthcare data captured during routine clinical care, such as electronic health records and insurance claims. Determine whether the patient had <disease>.

Use the following format:

Evidence in favor of <disease>:

Evidence against <disease>:

Summary: (Only "yes" or "no")

#### + write narrative

Act as a medical doctor reviewing a patient's healthcare data captured during routine clinical care, such as electronic health records and insurance claims. Write a medical narrative that fits the recorded health data followed by a determination of whether the patient had <disease>.

Use the following format:

Clinical narrative:

Evidence in favor of <disease>:

Evidence against <disease>:

Summary: (Only "yes" or "no")

#### + diagnosis insufficient reminder

Act as a medical doctor reviewing a patient's healthcare data captured during routine clinical care, such as electronic health records and insurance claims. Write a medical narrative that fits the recorded health data followed by a determination of whether the patient had <disease>.

Remember that recording a diagnosis for a disease could occur either because the patient had the disease or as justification for performing a diagnostic procedure to determine whether the patient has the disease. A diagnosis by itself or accompanied with only diagnostic procedures may therefore be insufficient evidence, even if recorded more than once. Lack of additional evidence of <disease> other than the diagnosis and diagnostic procedures probably means that the patient was only being tested, and does not actually have <disease>. However, it unlikely that a patient will be tested many times over, so an abundance of diagnoses will mean the patient has the disease.

Use the following format:

Clinical narrative:

Evidence in favor of <disease>:

Evidence against <disease>:

Summary: (Only "yes" or "no")

#### + uncertainty instructions

Act as a medical doctor reviewing a patient's healthcare data captured during routine clinical care, such as electronic health records and insurance claims.

Write a medical narrative that fits the recorded health data followed by a determination of whether the patient had <disease>.

Remember that recording a diagnosis for a disease could occur either because the patient had the disease or as justification for performing a diagnostic procedure to determine whether the patient has the disease. A diagnosis by itself or accompanied with only diagnostic procedures may therefore be insufficient evidence, even if recorded more than once. Lack of additional evidence of <disease> other than the diagnosis and diagnostic procedures probably means that the patient was only being tested, and does not actually have <disease>. However, it is unlikely that a patient will be tested many times over, so an abundance of diagnoses will mean the patient has the disease.

In your final summary, indicate "yes" if the most probable scenario is that the patient had <disease>.

Indicate "no" if it is not the most probable scenario, for example when it is more likely that the patient was tested for the disease but the diagnosis was not confirmed. Also indicate "no" when there is insufficient information to say anything about the relative probability of scenarios.

Use the following format:

Clinical narrative:

Evidence in favor of <disease>:

Evidence against <disease>:

Summary: (Only "yes" or "no")

#### + provide examples

Act as a medical doctor reviewing a patient's healthcare data captured during routine clinical care, such as electronic health records and insurance claims.

Examples:

Prompt: "

Write a medical narrative that fits the recorded health data followed by a determination of whether the patient had Rheumatoid arthritis.

Remember that recording a diagnosis for a disease could occur either because the patient had the disease or as justification for performing a diagnostic procedure to determine whether the patient has the disease. A diagnosis by itself or accompanied with only diagnostic procedures may therefore be insufficient evidence, even if recorded more than once. Lack of additional evidence of Rheumatoid arthritis other than the diagnosis and diagnostic procedures probably means that the patient was only being tested, and does not actually have Rheumatoid arthritis. However, it is unlikely that a patient will be tested many times over, so an abundance of diagnoses will mean the patient has the disease.

In your final summary, indicate 'yes' if the most probable scenario is that the patient had Rheumatoid arthritis.

Indicate 'no' if it is not the most probable scenario, for example when it is more

likely that the patient was tested for the disease but the diagnosis was not confirmed. Also indicate 'no' when there is insufficient information to say anything about the relative probability of scenarios.

Healthcare data:

Demographics and details about the visit: Female, 70 yo; Visit: Laboratory Visit

Diagnoses recorded on the day of the visit: Rheumatoid arthritis (Primary diagnosis);

Diagnoses recorded prior to the visit: None

Treatments recorded prior to the visit: None

Diagnostic procedures recorded proximal to the visit: Collection of venous blood by venipuncture (day -30, 0, 30)

Laboratory tests recorded proximal to the visit: None

Alternative diagnoses recorded proximal to the visit: None

Diagnoses recorded after the visit: Seropositive rheumatoid arthritis (day 90)

Treatments recorded during or after the visit: None

"

Response: "

Clinical narrative: A 70-year-old female patient visited the laboratory for the collection of venous blood by venipuncture. The primary diagnosis recorded on the day of the visit was rheumatoid arthritis. There were no alternative diagnoses recorded proximal to the visit. The patient did not receive any treatments prior to, during, or after the visit.

Evidence in favor of Rheumatoid arthritis: The recorded primary diagnosis recorded was rheumatoid arthritis, and this diagnosis was recorded again after the visit. The collection of venous blood by venipuncture was performed multiple times proximal to the visit, which suggests that the patient was being monitored for rheumatoid arthritis.

Evidence against Rheumatoid arthritis: No treatments for rheumatoid arthritis were recorded. For a chronic disease such as rheumatoid arthritis it is unlikely the diagnosis would have been recorded only twice.

Summary: No

"

Prompt: "

Write a medical narrative that fits the recorded health data followed by a determination of whether the patient had Acute bronchitis.

Remember that recording a diagnosis for a disease could occur either because the patient had the disease or as justification for performing a diagnostic procedure to determine whether the patient has the disease. A diagnosis by itself or accompanied

with only diagnostic procedures may therefore be insufficient evidence, even if recorded more than once. Lack of additional evidence of Acute bronchitis other than the diagnosis and diagnostic procedures probably means that the patient was only being tested, and does not actually have Acute bronchitis. However, it unlikely that a patient will be tested many times over, so an abundance of diagnoses will mean the patient has the disease.

In your final summary, indicate 'yes' if the most probable scenario is that the patient had Acute bronchitis.

Indicate 'no' if it is not the most probable scenario, for example when it is more likely that the patient was tested for the disease but the diagnosis was not confirmed. Also indicate 'no' when there is insufficient information to say anything about the relative probability of scenarios.

Healthcare data:

Demographics and details about the visit: Male, 18 yo; Visit: Pharmacy visit followed by Outpatient Visit

Diagnoses recorded on the day of the visit: Acute bronchitis (Primary diagnosis);

Diagnoses recorded prior to the visit: None

Treatments recorded prior to the visit: None

Diagnostic procedures recorded proximal to the visit: None

Laboratory tests recorded proximal to the visit: None

Alternative diagnoses recorded proximal to the visit: None

Diagnoses recorded after the visit: None

Treatments recorded during or after the visit: azithromycin (day 0, for 4 days);

"

Response: "

Clinical narrative: A 18-year-old male visited the pharmacy, had an outpatient visit, and was prescribed a short course of azithromycin. The primary diagnosis recorded on the day of the visit was Acute bronchitis. There were no alternative diagnoses recorded proximal to the visit.

Evidence in favor of Acute bronchitis: The primary diagnosis recorded on the day of the visit was acute bronchitis. The patient was prescribed azithromycin, which is commonly used to treat respiratory infections such as bronchitis.

Evidence against Acute bronchitis: No diagnostic procedures or laboratory tests were performed to confirm the diagnosis of acute bronchitis.

Summary: Yes

"

## Supplementary Note 5: Example prompt

Demographics and details about the visit: Male, 50 yo;

Visit: Pharmacy visit followed by Outpatient Visit

Diagnoses recorded on the day of the visit: Chronic kidney disease due to type 2 diabetes mellitus (Primary admission diagnosis); Chronic kidney disease due to type 2 diabetes mellitus (Primary diagnosis); Chronic kidney disease stage 5 (Admission diagnosis); Complication due to diabetes mellitus (Admission diagnosis); Essential hypertension (Admission diagnosis); Essential hypertension (Secondary diagnosis); Hyperlipidemia (Admission diagnosis); Proteinuria (Admission diagnosis); Renal disorder due to type 2 diabetes mellitus (Admission diagnosis); Renal disorder due to type 2 diabetes mellitus (Secondary diagnosis); Type 2 diabetes mellitus (Admission diagnosis); Type 2 diabetes mellitus (Primary admission diagnosis); Type 2 diabetes mellitus (Primary diagnosis); Vitamin D deficiency (Admission diagnosis); Vitamin D deficiency (Secondary diagnosis);

Diagnoses recorded prior to the visit: Anemia (day -900); Anemia in chronic kidney disease (day -810, -10); Anemia of chronic disease (day -890, -800); Chronic kidney disease (day -860, -820, -10); Chronic kidney disease due to hypertension (day -890, -800, -10); Chronic kidney disease due to type 2 diabetes mellitus (day -890, -10); Chronic kidney disease stage 3 (day -890, -820, -10); Vitamin D deficiency (day -820, -10)

Treatments recorded prior to the visit: None

Diagnostic procedures recorded proximal to the visit: None

Laboratory tests recorded proximal to the visit: None

Alternative diagnoses recorded proximal to the visit: Acute renal failure syndrome (day -10, 30)

Diagnoses recorded after the visit: Anemia (day 210, 290); Anemia in chronic kidney disease (day 170, 310, 1050, 1140, 1230, 1320, 1470); Anemia of chronic disease (day 30); Chronic kidney disease due to type 2 diabetes mellitus (day 30, 90, 250, 280, 920, 1080); Chronic kidney disease stage 4 (day 250); Chronic kidney disease stage 5 (day 90, 170, 210, 270); End-stage renal disease (day 290, 900, 1660); Hyperkalemia (day 30); Hyperlipidemia (day 90, 310); Hyperparathyroidism due to renal insufficiency (day 30, 170, 250, 280); Iron deficiency anemia (day 930); Vitamin D deficiency (day 170, 250, 280)

Treatments recorded during or after the visit: calcitriol (day 290, for 50 days);

## Supplementary Note 6: Example LLM output

Below is the response of GPT3.5 Turbo to the example prompt above:

Clinical narrative: A 50-year-old male with a history of type 2 diabetes mellitus, essential hypertension, hyperlipidemia, and chronic kidney disease presented to the pharmacy followed by an outpatient visit. The patient had multiple diagnoses related to chronic kidney disease, including chronic kidney disease due to type 2 diabetes mellitus, chronic kidney disease stage 5, and proteinuria. The patient also had a

diagnosis of vitamin D deficiency. No diagnostic procedures or laboratory tests were recorded proximal to the visit.

Evidence in favor of end stage renal disease:

- The patient had a diagnosis of chronic kidney disease stage 5 on the day of the visit and on multiple occasions prior to and after the visit.
- The patient had a diagnosis of end-stage renal disease on multiple occasions after the visit.

Evidence against end stage renal disease:

- No diagnostic procedures or laboratory tests were recorded proximal to the visit to confirm the diagnosis of end-stage renal disease.

Summary: Yes. The patient had multiple diagnoses related to chronic kidney disease, including chronic kidney disease stage 5 and end-stage renal disease on multiple occasions after the visit. Although no diagnostic procedures or laboratory tests were recorded proximal to the visit, the abundance of diagnoses related to chronic kidney disease and the subsequent diagnosis of end-stage renal disease make it the most probable scenario.

## Supplementary Note 7: Performance on test set 1

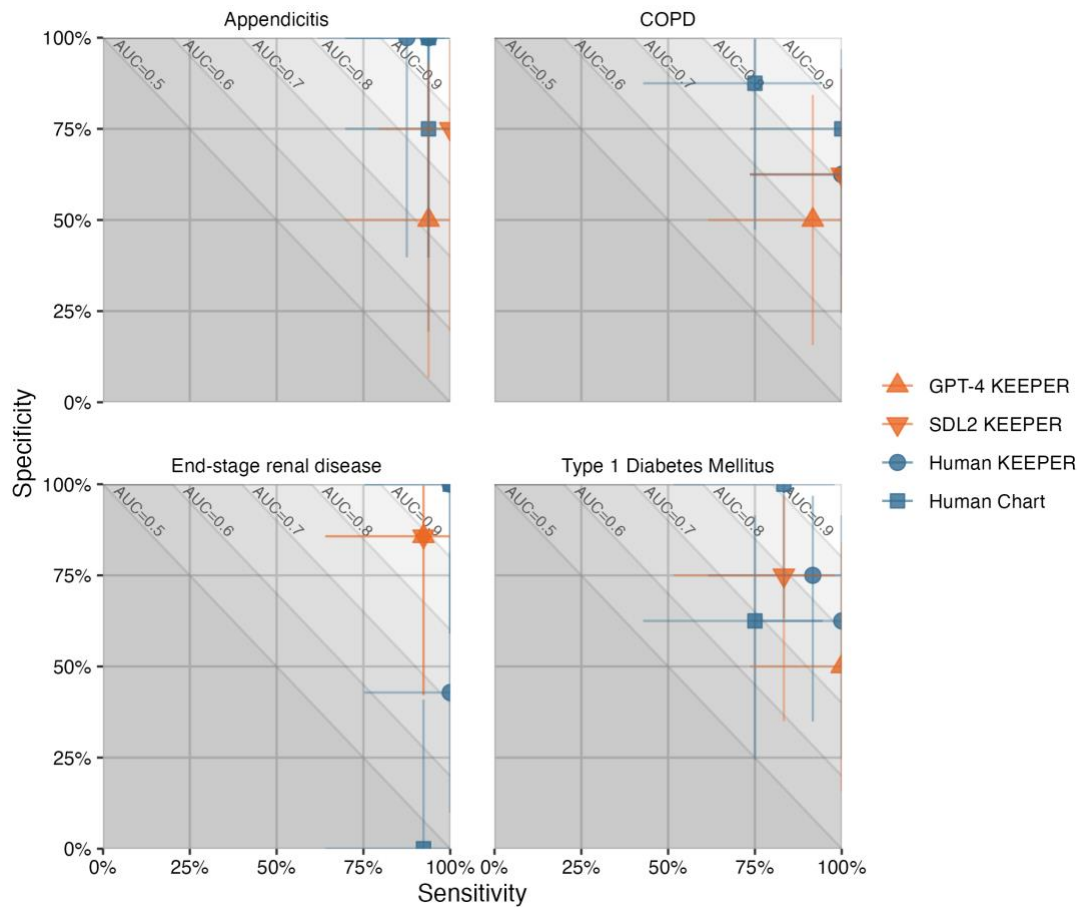

Sensitivity and specificity of reviewers for test set 1. Error bars indicate 95% confidence intervals. The gold standard was created by external reviewers. The % of patients considered cases in the gold standard is noted in each panel. Slanted lines denote iso-AUC contours, spaced 0.1 apart.

| Disease      | Reviewer          | Sensitivity        | Specificity        | AUC   |
|--------------|-------------------|--------------------|--------------------|-------|
| Overall      | Reviewer 1 Chart  | 92.5 (81.8-97.9)   | 77.8 (57.7-91.4)   | 0.851 |
| Overall      | Reviewer 1 KEEPER | 98.1 (89.9-100.0)  | 77.8 (57.7-91.4)   | 0.879 |
| Overall      | Reviewer 2 Chart  | 86.8 (74.7-94.5)   | 70.4 (49.8-86.2)   | 0.786 |
| Overall      | Reviewer 2 KEEPER | 94.3 (84.3-98.8)   | 66.7 (46.0-83.5)   | 0.805 |
| Overall      | GPT-4 KEEPER      | 94.3 (84.3-98.8)   | 59.3 (38.8-77.6)   | 0.768 |
| Overall      | SDL2 KEEPER       | 94.3 (84.3-98.8)   | 74.1 (53.7-88.9)   | 0.842 |
| Appendicitis | Reviewer 1 Chart  | 93.8 (69.8-99.8)   | 75.0 (19.4-99.4)   | 0.844 |
| Appendicitis | Reviewer 1 KEEPER | 93.8 (69.8-99.8)   | 100.0 (39.8-100.0) | 0.969 |
| Appendicitis | Reviewer 2 Chart  | 93.8 (69.8-99.8)   | 100.0 (39.8-100.0) | 0.969 |
| Appendicitis | Reviewer 2 KEEPER | 87.5 (61.7-98.4)   | 100.0 (39.8-100.0) | 0.938 |
| Appendicitis | GPT-4 KEEPER      | 93.8 (69.8-99.8)   | 50.0 (6.8-93.2)    | 0.719 |
| Appendicitis | SDL2 KEEPER       | 100.0 (79.4-100.0) | 75.0 (19.4-99.4)   | 0.875 |
| COPD         | Reviewer 1 Chart  | 100.0 (73.5-100.0) | 75.0 (34.9-96.8)   | 0.875 |



| Disease                  | Reviewer          | Sensitivity        | Specificity        | AUC   |
|--------------------------|-------------------|--------------------|--------------------|-------|
| COPD                     | Reviewer 1 KEEPER | 100.0 (73.5-100.0) | 62.5 (24.5-91.5)   | 0.812 |
| COPD                     | Reviewer 2 Chart  | 75.0 (42.8-94.5)   | 87.5 (47.3-99.7)   | 0.812 |
| COPD                     | Reviewer 2 KEEPER | 100.0 (73.5-100.0) | 62.5 (24.5-91.5)   | 0.812 |
| COPD                     | GPT-4 KEEPER      | 91.7 (61.5-99.8)   | 50.0 (15.7-84.3)   | 0.708 |
| COPD                     | SDL2 KEEPER       | 100.0 (73.5-100.0) | 62.5 (24.5-91.5)   | 0.812 |
| End-stage renal disease  | Reviewer 1 Chart  | 100.0 (75.3-100.0) | 100.0 (59.0-100.0) | 1.000 |
| End-stage renal disease  | Reviewer 1 KEEPER | 100.0 (75.3-100.0) | 100.0 (59.0-100.0) | 1.000 |
| End-stage renal disease  | Reviewer 2 Chart  | 92.3 (64.0-99.8)   | 0.0 (0.0-41.0)     | 0.462 |
| End-stage renal disease  | Reviewer 2 KEEPER | 100.0 (75.3-100.0) | 42.9 (9.9-81.6)    | 0.714 |
| End-stage renal disease  | GPT-4 KEEPER      | 92.3 (64.0-99.8)   | 85.7 (42.1-99.6)   | 0.890 |
| End-stage renal disease  | SDL2 KEEPER       | 92.3 (64.0-99.8)   | 85.7 (42.1-99.6)   | 0.890 |
| Type 1 Diabetes Mellitus | Reviewer 1 Chart  | 75.0 (42.8-94.5)   | 62.5 (24.5-91.5)   | 0.688 |
| Type 1 Diabetes Mellitus | Reviewer 1 KEEPER | 100.0 (73.5-100.0) | 62.5 (24.5-91.5)   | 0.812 |
| Type 1 Diabetes Mellitus | Reviewer 2 Chart  | 83.3 (51.6-97.9)   | 100.0 (63.1-100.0) | 0.917 |
| Type 1 Diabetes Mellitus | Reviewer 2 KEEPER | 91.7 (61.5-99.8)   | 75.0 (34.9-96.8)   | 0.833 |
| Type 1 Diabetes Mellitus | GPT-4 KEEPER      | 100.0 (73.5-100.0) | 50.0 (15.7-84.3)   | 0.750 |
| Type 1 Diabetes Mellitus | SDL2 KEEPER       | 83.3 (51.6-97.9)   | 75.0 (34.9-96.8)   | 0.792 |

## Supplementary Note 8: Performance on test set 2

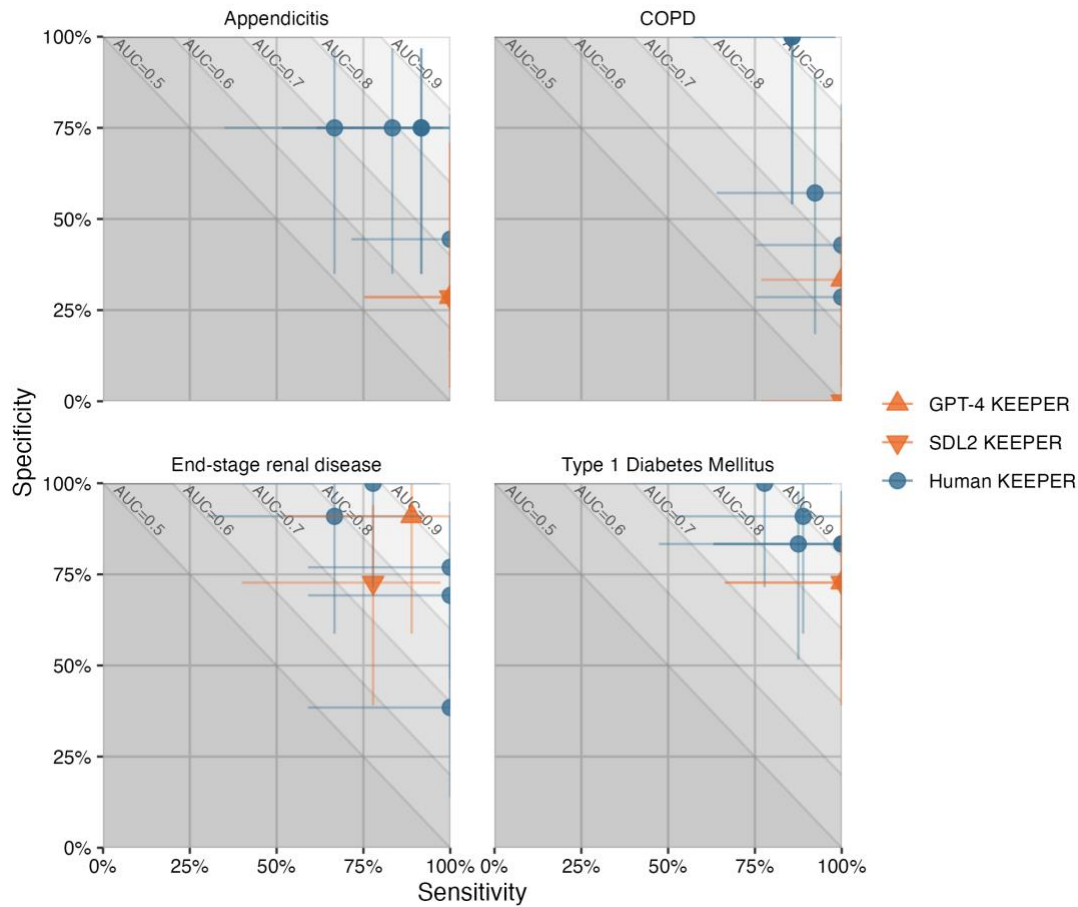

*Sensitivity and specificity of reviewers for test set 2. Error bars indicate 95% confidence intervals. The gold standard was the majority vote of human reviewers using a leave-one-out approach. The % of patients considered cases in the gold standard is noted in each panel. Slanted lines denote iso-AUC contours, spaced 0.1 apart.*

| Disease      | Reviewer   | Sensitivity        | Specificity      | AUC   |
|--------------|------------|--------------------|------------------|-------|
| Overall      | Reviewer 1 | 86.0 (72.1-94.7)   | 89.2 (74.6-97.0) | 0.876 |
| Overall      | Reviewer 2 | 95.0 (83.1-99.4)   | 57.5 (40.9-73.0) | 0.762 |
| Overall      | Reviewer 3 | 86.0 (72.1-94.7)   | 86.5 (71.2-95.5) | 0.863 |
| Overall      | Reviewer 4 | 95.0 (83.1-99.4)   | 70.0 (53.5-83.4) | 0.825 |
| Overall      | Reviewer 5 | 85.4 (70.8-94.4)   | 74.4 (57.9-87.0) | 0.799 |
| Overall      | GPT-4      | 97.8 (88.2-99.9)   | 62.9 (44.9-78.5) | 0.803 |
| Overall      | SDL2       | 95.6 (84.9-99.5)   | 51.4 (34.0-68.6) | 0.735 |
| Appendicitis | Reviewer 1 | 83.3 (51.6-97.9)   | 75.0 (34.9-96.8) | 0.792 |
| Appendicitis | Reviewer 2 | 91.7 (61.5-99.8)   | 75.0 (34.9-96.8) | 0.833 |
| Appendicitis | Reviewer 3 | 91.7 (61.5-99.8)   | 75.0 (34.9-96.8) | 0.833 |
| Appendicitis | Reviewer 4 | 100.0 (71.5-100.0) | 44.4 (13.7-78.8) | 0.722 |

| Disease                  | Reviewer   | Sensitivity        | Specificity        | AUC   |
|--------------------------|------------|--------------------|--------------------|-------|
| Appendicitis             | Reviewer 5 | 66.7 (34.9-90.1)   | 75.0 (34.9-96.8)   | 0.708 |
| Appendicitis             | GPT-4      | 100.0 (75.3-100.0) | 28.6 (3.7-71.0)    | 0.643 |
| Appendicitis             | SDL2       | 100.0 (75.3-100.0) | 28.6 (3.7-71.0)    | 0.643 |
| COPD                     | Reviewer 1 | 85.7 (57.2-98.2)   | 100.0 (54.1-100.0) | 0.929 |
| COPD                     | Reviewer 2 | 100.0 (75.3-100.0) | 28.6 (3.7-71.0)    | 0.643 |
| COPD                     | Reviewer 3 | 85.7 (57.2-98.2)   | 100.0 (54.1-100.0) | 0.929 |
| COPD                     | Reviewer 4 | 92.3 (64.0-99.8)   | 57.1 (18.4-90.1)   | 0.747 |
| COPD                     | Reviewer 5 | 100.0 (75.3-100.0) | 42.9 (9.9-81.6)    | 0.714 |
| COPD                     | GPT-4      | 100.0 (76.8-100.0) | 33.3 (4.3-77.7)    | 0.667 |
| COPD                     | SDL2       | 100.0 (76.8-100.0) | 0.0 (0.0-45.9)     | 0.500 |
| End-stage renal disease  | Reviewer 1 | 77.8 (40.0-97.2)   | 100.0 (71.5-100.0) | 0.889 |
| End-stage renal disease  | Reviewer 2 | 100.0 (59.0-100.0) | 38.5 (13.9-68.4)   | 0.692 |
| End-stage renal disease  | Reviewer 3 | 66.7 (29.9-92.5)   | 90.9 (58.7-99.8)   | 0.788 |
| End-stage renal disease  | Reviewer 4 | 100.0 (59.0-100.0) | 76.9 (46.2-95.0)   | 0.885 |
| End-stage renal disease  | Reviewer 5 | 100.0 (59.0-100.0) | 69.2 (38.6-90.9)   | 0.846 |
| End-stage renal disease  | GPT-4      | 88.9 (51.8-99.7)   | 90.9 (58.7-99.8)   | 0.899 |
| End-stage renal disease  | SDL2       | 77.8 (40.0-97.2)   | 72.7 (39.0-94.0)   | 0.753 |
| Type 1 Diabetes Mellitus | Reviewer 1 | 100.0 (63.1-100.0) | 83.3 (51.6-97.9)   | 0.917 |
| Type 1 Diabetes Mellitus | Reviewer 2 | 87.5 (47.3-99.7)   | 83.3 (51.6-97.9)   | 0.854 |
| Type 1 Diabetes Mellitus | Reviewer 3 | 100.0 (63.1-100.0) | 83.3 (51.6-97.9)   | 0.917 |
| Type 1 Diabetes Mellitus | Reviewer 4 | 88.9 (51.8-99.7)   | 90.9 (58.7-99.8)   | 0.899 |
| Type 1 Diabetes Mellitus | Reviewer 5 | 77.8 (40.0-97.2)   | 100.0 (71.5-100.0) | 0.889 |
| Type 1 Diabetes Mellitus | GPT-4      | 100.0 (66.4-100.0) | 72.7 (39.0-94.0)   | 0.864 |
| Type 1 Diabetes Mellitus | SDL2       | 100.0 (66.4-100.0) | 72.7 (39.0-94.0)   | 0.864 |

## Supplementary Note 9: Performance on test set 3

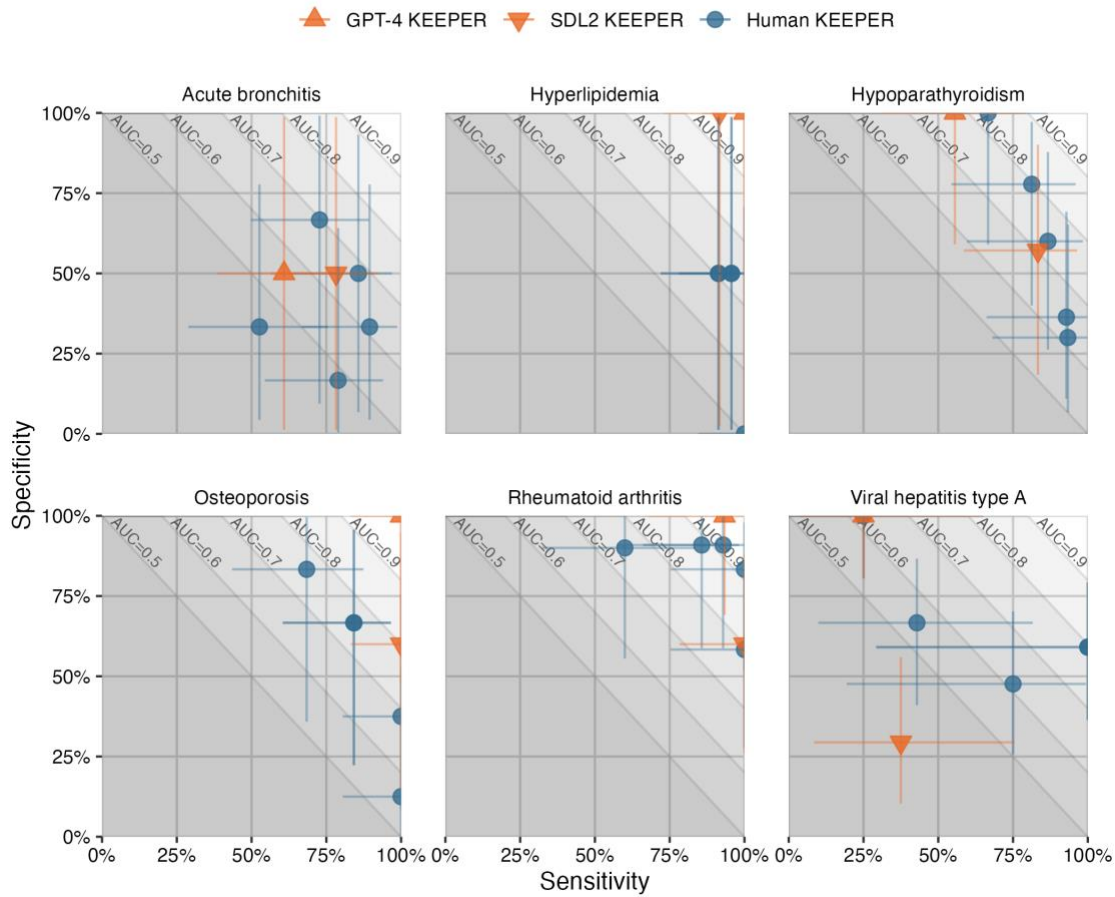

Sensitivity and specificity of reviewers for test set 3. Error bars indicate 95% confidence intervals. The gold standard was the majority vote of human reviewers using a leave-one-out approach. The % of patients considered cases in the gold standard is noted in each panel. Slanted lines denote iso-AUC contours, spaced 0.1 apart.

| Disease          | Reviewer   | Sensitivity      | Specificity      | AUC   |
|------------------|------------|------------------|------------------|-------|
| Overall          | Reviewer 1 | 89.4 (81.3-94.8) | 53.6 (39.7-67.0) | 0.715 |
| Overall          | Reviewer 2 | 94.3 (87.2-98.1) | 41.9 (29.5-55.2) | 0.681 |
| Overall          | Reviewer 3 | 83.2 (74.4-89.9) | 73.5 (58.9-85.1) | 0.783 |
| Overall          | Reviewer 4 | 81.4 (72.3-88.6) | 71.7 (57.7-83.2) | 0.766 |
| Overall          | Reviewer 5 | 74.2 (64.3-82.6) | 71.7 (57.7-83.2) | 0.730 |
| Overall          | GPT-4      | 77.8 (68.8-85.2) | 97.6 (87.4-99.9) | 0.877 |
| Overall          | SDL2       | 86.1 (78.1-92.0) | 47.6 (32.0-63.6) | 0.669 |
| Acute bronchitis | Reviewer 1 | 89.5 (66.9-98.7) | 33.3 (4.3-77.7)  | 0.614 |
| Acute bronchitis | Reviewer 2 | 78.9 (54.4-93.9) | 16.7 (0.4-64.1)  | 0.478 |
| Acute bronchitis | Reviewer 3 | 85.7 (63.7-97.0) | 50.0 (6.8-93.2)  | 0.679 |
| Acute bronchitis | Reviewer 4 | 72.7 (49.8-89.3) | 66.7 (9.4-99.2)  | 0.697 |
| Acute bronchitis | Reviewer 5 | 52.6 (28.9-75.6) | 33.3 (4.3-77.7)  | 0.430 |

| Disease                | Reviewer   | Sensitivity        | Specificity        | AUC   |
|------------------------|------------|--------------------|--------------------|-------|
| Acute bronchitis       | GPT-4      | 60.9 (38.5-80.3)   | 50.0 (1.3-98.7)    | 0.554 |
| Acute bronchitis       | SDL2       | 78.3 (56.3-92.5)   | 50.0 (1.3-98.7)    | 0.641 |
| Hyperlipidemia         | Reviewer 1 | 91.3 (72.0-98.9)   | 50.0 (1.3-98.7)    | 0.707 |
| Hyperlipidemia         | Reviewer 2 | 100.0 (84.6-100.0) | 0.0 (0.0-70.8)     | 0.500 |
| Hyperlipidemia         | Reviewer 3 | 95.7 (78.1-99.9)   | 50.0 (1.3-98.7)    | 0.728 |
| Hyperlipidemia         | Reviewer 4 | 95.7 (78.1-99.9)   | 50.0 (1.3-98.7)    | 0.728 |
| Hyperlipidemia         | Reviewer 5 | 91.3 (72.0-98.9)   | 50.0 (1.3-98.7)    | 0.707 |
| Hyperlipidemia         | GPT-4      | 100.0 (85.8-100.0) | 100.0 (2.5-100.0)  | 1.000 |
| Hyperlipidemia         | SDL2       | 91.7 (73.0-99.0)   | 100.0 (2.5-100.0)  | 0.958 |
| Hypoparathyroidism     | Reviewer 1 | 93.3 (68.1-99.8)   | 30.0 (6.7-65.2)    | 0.617 |
| Hypoparathyroidism     | Reviewer 2 | 92.9 (66.1-99.8)   | 36.4 (10.9-69.2)   | 0.646 |
| Hypoparathyroidism     | Reviewer 3 | 66.7 (41.0-86.7)   | 100.0 (59.0-100.0) | 0.833 |
| Hypoparathyroidism     | Reviewer 4 | 81.2 (54.4-96.0)   | 77.8 (40.0-97.2)   | 0.795 |
| Hypoparathyroidism     | Reviewer 5 | 86.7 (59.5-98.3)   | 60.0 (26.2-87.8)   | 0.733 |
| Hypoparathyroidism     | GPT-4      | 55.6 (30.8-78.5)   | 100.0 (59.0-100.0) | 0.778 |
| Hypoparathyroidism     | SDL2       | 83.3 (58.6-96.4)   | 57.1 (18.4-90.1)   | 0.702 |
| Osteoporosis           | Reviewer 1 | 84.2 (60.4-96.6)   | 66.7 (22.3-95.7)   | 0.754 |
| Osteoporosis           | Reviewer 2 | 100.0 (80.5-100.0) | 12.5 (0.3-52.7)    | 0.562 |
| Osteoporosis           | Reviewer 3 | 84.2 (60.4-96.6)   | 66.7 (22.3-95.7)   | 0.754 |
| Osteoporosis           | Reviewer 4 | 68.4 (43.4-87.4)   | 83.3 (35.9-99.6)   | 0.759 |
| Osteoporosis           | Reviewer 5 | 100.0 (80.5-100.0) | 37.5 (8.5-75.5)    | 0.688 |
| Osteoporosis           | GPT-4      | 100.0 (83.2-100.0) | 100.0 (47.8-100.0) | 1.000 |
| Osteoporosis           | SDL2       | 100.0 (83.2-100.0) | 60.0 (14.7-94.7)   | 0.800 |
| Rheumatoid arthritis   | Reviewer 1 | 92.9 (66.1-99.8)   | 90.9 (58.7-99.8)   | 0.919 |
| Rheumatoid arthritis   | Reviewer 2 | 100.0 (75.3-100.0) | 58.3 (27.7-84.8)   | 0.792 |
| Rheumatoid arthritis   | Reviewer 3 | 100.0 (75.3-100.0) | 83.3 (51.6-97.9)   | 0.917 |
| Rheumatoid arthritis   | Reviewer 4 | 85.7 (57.2-98.2)   | 90.9 (58.7-99.8)   | 0.883 |
| Rheumatoid arthritis   | Reviewer 5 | 60.0 (32.3-83.7)   | 90.0 (55.5-99.7)   | 0.750 |
| Rheumatoid arthritis   | GPT-4      | 93.3 (68.1-99.8)   | 100.0 (69.2-100.0) | 0.967 |
| Rheumatoid arthritis   | SDL2       | 100.0 (78.2-100.0) | 60.0 (26.2-87.8)   | 0.800 |
| Viral hepatitis type A | Reviewer 1 | 75.0 (19.4-99.4)   | 47.6 (25.7-70.2)   | 0.613 |
| Viral hepatitis type A | Reviewer 2 | 100.0 (29.2-100.0) | 59.1 (36.4-79.3)   | 0.795 |
| Viral hepatitis type A | Reviewer 3 | 42.9 (9.9-81.6)    | 66.7 (41.0-86.7)   | 0.548 |
| Viral hepatitis type A | Reviewer 4 | 100.0 (29.2-100.0) | 59.1 (36.4-79.3)   | 0.795 |
| Viral hepatitis type A | Reviewer 5 | 25.0 (3.2-65.1)    | 100.0 (80.5-100.0) | 0.625 |
| Viral hepatitis type A | GPT-4      | 25.0 (3.2-65.1)    | 100.0 (80.5-100.0) | 0.625 |
| Viral hepatitis type A | SDL2       | 37.5 (8.5-75.5)    | 29.4 (10.3-56.0)   | 0.335 |
